1 **Pathogen and endophyte assemblages co-vary with beech bark disease progression, tree**  
2 **decline, and regional climate**

3  
4 Eric W. Morrison <sup>a</sup>, Matt T. Kasson <sup>b</sup>, Jeremy J. Heath <sup>a</sup>, Jeff R. Garnas <sup>a</sup>

5 <sup>a</sup>Department of Natural Resources and the Environment, University of New Hampshire,  
6 Durham, NH 03824, USA

7 <sup>b</sup>Division of Plant and Soil Sciences, West Virginia University, Morgantown, WV 26506, USA

8  
9 **Abstract**

10 Plant-pathogen interactions are often considered in a pairwise manner with minimal  
11 consideration of the impacts of the broader endophytic community on disease progression and/or  
12 outcomes for disease agents and hosts. Community interactions may be especially relevant in the  
13 context of disease complexes (i.e, interacting or functionally redundant causal agents) and  
14 decline diseases (where saprobes and weak pathogens synergize the effects of primary infections  
15 and hasten host mortality). Here we describe the bark endophyte communities associated with a  
16 widespread decline disease of American beech, beech bark disease (BBD), caused by an invasive  
17 scale insect (*Cryptococcus fagisuga*) and two fungal pathogens, *Neonectria faginata* and *N.*  
18 *ditissima*. We show that the two primary fungal disease agents co-occur more broadly than  
19 previously understood (35.5% of infected trees), including within the same 1-cm diameter  
20 phloem samples. The two species appear to have contrasting associations with climate and stages  
21 of tree decline, wherein *N. faginata* was associated with warmer and *N. ditissima* with cooler  
22 temperatures. *Neonectria ditissima* showed a positive association with tree crown dieback – no  
23 such association was observed for *N. faginata*. Further, we identify fungal endophytes that may

24 modulate disease progression as entomopathogens, mycoparasites, saprotrophs and/or additional  
25 pathogens, including *Clonostachys rosea* and *Fusarium babinda*. These fungi may alter the  
26 trajectory of disease via feedbacks with the primary disease agents or by altering symptom  
27 expression or rates of tree decline across the range of BBD.

28

29 Keywords: Fungal community; Tree decline; Pathogenic fungi; Multi-species disease complex;

30 Amplicon sequencing

31

32

## 33 1. Introduction

34 Plant-microbe or plant-insect interactions are often considered in a pairwise manner with  
35 minimal consideration of the impacts of the broader community on the nature and outcomes of  
36 herbivory or pathogen attack. In some systems, tri- or even multipartite interactions have been  
37 shown to be important, particularly where fungus-insect or fungus-insect-mite symbioses are  
38 involved (Wingfield et al., 2010, 2016). Rarely, however, are broader communities considered,  
39 despite the fact that pathogens and insects attacking forest trees are embedded in variable and/or,  
40 in the case of non-native species, novel communities. In the most aggressive and well-studied  
41 examples (e.g., Chestnut blight, Dutch elm disease, or the more recent Emerald ash borer),  
42 disease agent aggressiveness and ensuing host mortality may be sufficiently rapid such that co-  
43 occurrence with other organisms is of minimal relevance to system dynamics, though  
44 colonization with certain endophytic microbes can influence host susceptibility (Feau and  
45 Hamelin, 2017) or pathogen aggressiveness (Kolp et al., 2020) in subtle or complex ways. Often,  
46 however, interactions with host trees are embedded in a diverse community that varies both  
47 spatially and temporally, and diseases “complexes” (diseases with multiple causal agents that act  
48 in concert to produce symptoms and mediate host decline), are increasingly recognized as  
49 important (Desprez-Loustau et al., 2016). The role of the community in determining host fate is  
50 extremely difficult to ascertain and could proceed via multiple, potentially interacting  
51 mechanisms (Table 1).

52 Beech bark disease (BBD) in North America is a canker disease of American beech  
53 (*Fagus grandifolia*) caused by an invasive scale insect, *Cryptococcus fagisuga* Lind., and one of  
54 two presumptively native fungal pathogens, *Neonectria faginata* and *N. ditissima*. BBD is  
55 referred to as a disease complex because it involves both insects and fungi with at least some

56 degree of ecological redundancy with respect to disease etiology and symptom development. The  
57 invasive felted beech scale (*C. fagisuga*) is recognized as the primary initiating agent of BBD  
58 symptoms, but only inasmuch as it facilitates infection of beech trees by the fungal BBD  
59 pathogens *Neonectria faginata* and *N. ditissima* (Ehrlich, 1934). Both *N. faginata* and *N.*  
60 *ditissima* cause similar cankering infections and bole defects resulting in host callus tissue  
61 formation (Cotter and Blanchard, 1991). In addition to the primary disease agents, at least two  
62 fungal mycoparasites are known from the BBD system – *Clonostachys rosea* (the anamorph and  
63 preferred name of *Bionectria ochroleuca*; Houston et al., 1987; Schroers et al., 1999; Rossman et  
64 al., 2013; Stauder et al., 2020a) and *Nematogonum ferrugineum* (Houston, 1983). Other fungi are  
65 regularly isolated from infected trees (i.e., *Fusarium babinda*; Stauder et al., 2020a) though their  
66 roles are less clear. Further, saprotrophic fungi are likely involved in late stages of disease  
67 wherein host stem tissue is weakened to the point of mechanical failure (“beech snap”, Houston,  
68 1994), though the presence or importance of wood rot fungi on disease progression is unknown.

69 In addition to questions of the role of the broader community in disease dynamics, the  
70 relative frequency and ecological importance of the two primary (*Neonectria*) pathogens has  
71 long been the subject of study and debate. While apparently ecologically similar within the BBD  
72 system, the life histories of these fungi differ in important ways. For example, *Neonectria*  
73 *ditissima* is a generalist that infects many diverse tree hosts including species of birch, maple,  
74 walnut, mountain ash, and holly, among others (Castlebury et al., 2006; Stauder et al., 2020a).  
75 The species is also an important pathogen of apple (Gomez-Cortecero et al., 2016). The diversity  
76 and abundance of alternative hosts could plausibly influence ecological and evolutionary  
77 dynamics (Houston, 1994; Kasson and Livingston, 2009), though this question has not been  
78 adequately studied to date. In contrast, *N. faginata* has never been observed outside of the BBD

79 complex in North America (Castlebury et al., 2006) despite recent surveys focused on  
80 uncovering possible cryptic native reservoirs for this pathogen (Stauder et al., 2020a).

81         These fungi exhibit spatiotemporal trends with respect to the timing of site-level  
82 infestation with the felted scale. The current range of beech bark disease is defined by the range  
83 of the felted beech scale, which, unlike many forest pests, has spread slowly (~13 km per year;  
84 Morin et al., 2007) from the site of initial introduction in Halifax, Nova Scotia in 1890. This  
85 progression, together with a handful of long-distance dispersal events (i.e., to North Carolina,  
86 West Virginia, and Michigan) has resulted in a gradient of duration of infestation ranging from  
87 very recent (~9 years in Wisconsin) to more than eight decades (86 years in Maine) (Houston,  
88 1994; Cale et al., 2017). Surveys of *Neonectria* species distribution have generally found *N.*  
89 *ditissima* to be more prevalent in the killing front of the disease (i.e., 10-20 years post scale  
90 insect arrival; Cale et al., 2017 and references therein). *Neonectria faginata* appears to dominate  
91 aftermath forests to the degree that researchers have suggested near replacement of *N. ditissima*  
92 with *N. faginata* as early as seven years after pathogen attack becomes apparent (Houston, 1994;  
93 Cale et al., 2017). However, *N. ditissima* can maintain a presence in stands dominated by *N.*  
94 *faginata*, including within the same tree (Kasson and Livingston, 2009). Persistence of *N.*  
95 *ditissima* in areas that are previously BBD-affected may be attributed to reinfection from  
96 reservoirs of this fungus in non-beech hardwood tree hosts (Kasson and Livingston, 2009),  
97 and/or the development of secondary killing fronts when climatic conditions allow beech scale to  
98 colonize areas where it was previously inhibited (e.g., release from killing winter temperatures  
99 by warm periods; Kasson and Livingston, 2012). These species – while morphologically  
100 indistinguishable in the field – can be separated using culture morphology and spore size  
101 measurements, though the latter process is tedious and is dependent on the presence of sexually

102 produced ascospores. Further, spore size comparisons can only detect co-infection if either both  
103 species are simultaneously producing perithecia (sexual spore structures) or multiple isolates are  
104 collected, cultured, and induced to mate and produce sexual structures (Cotter and Blanchard,  
105 1981; Stauder et al., 2020b). Partly because of these challenges, it is yet unclear whether trends  
106 in species dominance with infection duration are consistent, whether *N. ditissima* plays an  
107 important and/or predictable role in aftermath forests, and how the prevalence and distribution of  
108 each species reflects climate, disease stage, and other tree host and environmental conditions.

109         The objectives of this study are twofold. First, we examine patterns of occurrence (and  
110 co-occurrence) of *N. faginata* and *N. ditissima* across the current range of BBD and use joint  
111 species distribution modeling to evaluate hypothesized biotic and abiotic drivers of the  
112 prevalence and relative dominance of these species. Second, we characterize the bark  
113 mycobiome of American beech using Illumina-based metabarcoding on bark samples collected  
114 from across the range of BBD to ask how disease-associated communities vary geographical and  
115 to assess the fidelity and potential role of key species within the BBD system, whether as direct  
116 or indirect drivers or as indicators of disease state. Based on previously observed patterns with  
117 respect to disease dynamics across the range of BBD, we evaluated the relative contribution of  
118 hypothesized drivers of pathogen and associated community distribution, including duration of  
119 regional infection with BBD, disease severity (i.e., tree condition as well as beech scale and  
120 *Neonectria* perithecia density), and climate.

121

## 122 **2. Methods**

### 123 *2.1 Site description and sample collection*

124 Bark disks including phloem tissue were collected from American beech (*Fagus grandifolia*)  
125 from ten sites across the range of BBD. Sites ranged from northern Maine, western North  
126 Carolina, and eastern Wisconsin, representing latitudinal and longitudinal transects across the  
127 current range of BBD with a range of infection duration (Table 2). Sampling was performed  
128 from December 2017 through January 2019. At each site American beech trees were surveyed  
129 for levels of *Neonectria* perithecia density, beech scale density, crown dieback, and amount of  
130 cankering. Scale insect and *Neonectria* fruiting density were scored on a 0-5 ordinal scale  
131 (Houston et al., 2005; Garnas et al., 2011a) and tree condition on a 0-4 scale. Distinct cankering  
132 types were pooled and measured as roughly corresponding to 20% bins by bole coverage. Trees  
133 were sampled along 100 x 5 m transects in a random direction from starting point up to a  
134 maximum of 50 trees or 400 meters. All trees were measured along the transect to facilitate  
135 estimation of tree density and size distribution, etc. Where possible, stratified random sampling  
136 was performed for bark plug collection so as to obtain an unbiased sample across a range of tree  
137 conditions. Stratified sampling levels were tree size (three levels 1<sup>st</sup>, 2<sup>nd</sup>/3<sup>rd</sup>, and 4<sup>th</sup> quartile of  
138 diameter at breast height [DBH]), four levels of *Neonectria* perithecia density (0, 1, 2-3, 4-5),  
139 and two levels of beech scale density (0-1 v. 2-5), yielding 24 possible stratification levels. It  
140 was not possible to collect all combinations at all sites, but most sites had representative trees in  
141 most categories. In particular, in one site (Wisconsin) there were no visible *Neonectria* perithecia  
142 and we instead stratified within DBH and the available levels of beech scale density (2-3, 4-5)  
143 with four replicates per stratum (n = 24). Bark plugs were collected using a flame-sterilized 1-cm  
144 diameter hollow leather punch and stored on ice in sterile 24-well plates. Multiple plugs were  
145 taken from a random subset of trees with number of plugs ranging from 1-6. Samples were

146 stored on ice and then frozen within 48 hours of sampling and stored at  $-20^{\circ}\text{C}$  until processed for  
147 DNA extraction.

148 We used the PRISM dataset (PRISM Climate Group, 2020) to calculate climate variables  
149 for each site. We first determined the start and end dates of the growing season in each year  
150 based on empirical values describing heat accumulation for American beech leaf out and leaf  
151 drop (Richardson et al., 2006), wherein bud break for a given site and year was estimate as the  
152 date when a site had accumulated 100 cumulative  $\text{GDD}_4$  (base  $4^{\circ}\text{C}$ ) from January 1. Leaf drop  
153 was defined by 500 cumulative chilling degree days (below  $20^{\circ}\text{C}$ ) from August 15. These  
154 calculations resulted in leaf out estimates ranging from March 15 to May 12 and leaf fall  
155 estimates from October 20 to November 8 along the natural climate gradient among sites. We  
156 considered nongrowing season climate because fungi are likely to grow in periods where  
157 minimum temperatures are non-limiting, and growth during periods of tree host dormancy may  
158 be important for fungal establishment, growth, and/or aggressiveness. We then summed  $\text{GDD}_4$ ,  
159 daily precipitation, and freeze-thaw frequency (the number of days that temperatures crossed  
160  $0^{\circ}\text{C}$ ) for both the growing season and nongrowing season.

161

## 162 *2.2 DNA extraction, PCR, and sequencing*

163 Phloem plugs were prepared for DNA extraction by removing surface debris, *Neonectria*  
164 perithecia, and the periderm layer using a sterile scalpel. Plugs were then washed under a steady  
165 stream of 1 ml sterile 1x PBS pH 7.2 buffer. Phloem plugs were freeze-dried for 24 hours then  
166 crushed and homogenized, and a subsample of phloem (mean  $56 \text{ mg} \pm 1 \text{ mg}$  standard error) was  
167 subjected to bead bashing. DNA was extracted from ground phloem samples using a QIAGEN  
168 DNeasy Plant Mini Kit following the factory protocol. Extracted DNA was then purified using a



169 Zymo OneStep PCR Inhibitor Removal Kit following the factory protocol and diluted 1:10 in  
170 PCR grade water.

171 The ITS2 region was amplified in duplicate PCR reactions with the primers 5.8S-Fun and  
172 ITS4-Fun using Phusion High Fidelity polymerase, a 58°C annealing temperature, and 30 PCR  
173 cycles (Taylor et al., 2016). Primers included the Illumina TruSeq adapters and sample  
174 identification tags were added to amplicons via a second round PCR at the University of New  
175 Hampshire Hubbard Center for Genome Studies. A dual-unique indexing strategy was used such  
176 that each sample had a matching pair of indices on forward and reverse reads in order to reduce  
177 potential for sample misassignment due to index switching or index bleed. We included PCR  
178 negatives (one per PCR plate) and DNA extraction negatives (one per kit) in the sequencing run.

179

### 180 *2.3 Bioinformatic analyses*

181 Amplicon sequence variant (ASV) calling was performed using the DADA2 (Callahan et al.,  
182 2016) protocol v1.8 for ITS sequences in R 3.6.2 (DADA2 version 1.14.0), with an additional  
183 step to extract the ITS2 region from 5.8S-Fun–ITS4-Fun amplicon sequences using *itsxpress*  
184 (Rivers et al., 2018). The core DADA2 algorithm was run with option `pool = TRUE` to allow  
185 greater sensitivity for ASVs that were rare in a single sample but more abundant across the entire  
186 dataset, and putative chimeras were removed using *DADA2::removeBimeraDenovo*. Sequences  
187 from trees with multiple plugs were pooled at the tree level before ASV calling. Taxonomy was  
188 assigned to ASV representative sequences by comparison to the UNITE dynamically clustered  
189 database (release date 04/02/2020; Nilsson et al., 2019) using the *DADA2::assignTaxonomy*  
190 algorithm.

191 We used the LULU post-processing algorithm to group putatively erroneous ASVs with  
192 their parent ASVs based on sequence similarity and co-occurrence patterns (Frøslev et al., 2017),  
193 which has been shown to improve reconstruction of biological taxa for fungi relative to ASV  
194 denoising alone (Pauvert et al., 2019). We note that this is not a clustering algorithm but rather  
195 uses minimum sequence similarity as the first of three criteria for culling of likely error variants.  
196 After comparing a range of minimum sequence similarity thresholds (84%, 90%, 93%, 95%) we  
197 selected a 93% threshold, which maximized the identification and removal of likely erroneous  
198 ASVs while minimizing taxonomic reassignment.

199 One of the goals of this study was to determine the distribution of *N. faginata* and *N.*  
200 *ditissima* across the range of BBD. In order to increase sensitivity for the detection, after calling  
201 ASVs we subsequently mapped the original quality filtered reads to representative sequences for  
202 ASVs identified as *N. faginata* and *N. ditissima* using the `vsearch usearch\_global` algorithm  
203 (Rognes et al., 2016). This approach increases detection sensitivity by including reads that may  
204 have otherwise been discarded or misassigned during ASV calling steps (Edgar 2013; Pauvert et  
205 al., 2019). Samples were scored as containing *N. faginata* or *N. ditissima* if the species were  
206 discovered in a sample using either the ASV calling or mapping-based approaches. Singleton  
207 ASVs were removed from the dataset and samples with less than 1000 sequences after singleton  
208 filtering were also excluded.

209

#### 210 *2.4 Statistical analyses*

211 We first performed pairwise correlations of site characteristics data to examine relationships  
212 between disease severity and climate variables using the R package Hmisc (Harrell et al., 2019).  
213 These were either means of disease severity variables collected from random transects, or 10-

214 year mean climate variables for each site extracted from the PRISM database. We first tested for  
215 normality using a Shapiro-Wilk test (Shapiro and Wilk 1965). We report Spearman rank  
216 correlation ( $\rho$ ) where one or both variables was non-normal (including all ordinal variables) – for  
217 other variables we report Pearson correlation ( $r$ ).

218 To test for deviations from random patterns of co-occurrence of the two *Neonectria*  
219 species we used a probabilistic model (Veech 2013; Griffith et al., 2016). In brief, all possible  
220 permutations of species occurrence were determined based on the number of samples and  
221 observed species frequencies. A probability distribution was then calculated wherein the  
222 probability of a given co-occurrence frequency was equal to the number of permutations with  
223 that co-occurrence frequency as a proportion of the total possible permutations. Significant  
224 deviations from random were then assessed by comparing the observed co-occurrence to the  
225 probability distribution with  $P$  equal to the sum of probabilities for co-occurrence in less than  
226 ( $P_{lt}$ ) or greater than ( $P_{gt}$ ) the observed number of samples. We excluded samples from the  
227 Wisconsin site, which at nine years post-beech scale colonization had a considerable number of  
228 uninfected trees that would have skewed the analysis toward detecting aggregation.

229 To examine the effects of environmental covariates on *N. faginata* and *N. ditissima*  
230 occurrence, we applied spatially explicit joint species distribution modeling implemented in the  
231 R HMSC package (Ovaskainen et al., 2016; Ovaskainen et al., 2017; Tikhonov et al., 2017). We  
232 used the *N. faginata* and *N. ditissima* presence-absence matrix as the dependent variables and  
233 employed a probit link function. Pairwise site geographic distance was included as a random  
234 effect to control for spatial correlations between predictors and *Neonectria* occurrence. Tree was  
235 included as nested random effect (within site); log(sequence count) was included as a fixed effect  
236 to account for sampling depth effects on species detection probability (Ovaskainen et al., 2017).

237 Non-growing season climate variables were stronger predictors of *Neonectria* occurrence in  
238 exploratory analyses, and we therefore only considered nongrowing season variables in  
239 subsequent models. The primary model included climate variables and disease severity variables  
240 in order to determine the best predictors of *N. faginata* and *N. ditissima* occurrence. Independent  
241 variables were standardized to their respective means and standard deviations to obtain  
242 comparable slope estimates. We report Tjur's  $R^2$ , a coefficient of determination for logistic  
243 regression, (Tjur, 2009; Ovaskainen et al., 2017) along with slope coefficients. To minimize  
244 issues with multicollinearity, precipitation was excluded from the model due to strong  
245 correlations with beech scale density ( $\rho = -0.88$ ,  $P < 0.001$ ) and DBH ( $\rho = -0.73$ ,  $P = 0.02$ ,  
246 Supplemental Table S1).

247 We used PERMANOVA (*vegan::adonis* function, Oksanen et al., 2019) to determine  
248 whether *Neonectria* species occurrences were associated with differences in composition of the  
249 remaining community. We used the presence-absence of each ASV with greater than 10%  
250 frequency as predictors of community composition, by first randomly subsampling the dataset to  
251 1000 sequences per sample, iteratively removing each predictor ASV from the dependent  
252 variable matrix, and then performing PERMANOVA on transformed sequence counts ( $\log_{10}+1$ )  
253 with the removed ASV as a categorical predictor. We tested for a relationship between ASV  
254 frequency and its strength as a predictor of community composition by regressing  
255 PERMANOVA  $R^2$  against ASV sample incidence.

256 We next used indicator species analysis to explore whether certain species were  
257 associated with *Neonectria* species occurrence, *Neonectria* perithecia density, beech scale  
258 density, crown dieback, or cankering using the *indicspecies::multipatt* function (De Caceres and  
259 Legendre, 2009). We chose these variables because in combination they describe various stages

260 of tree decline and aspects of disease and are amenable to transformation to categorical  
261 predictors (and therefore appropriate for ISA analysis). We used the sample-ASV matrix,  
262 randomly selecting 1000 sequences per sample for this analysis. We then identified ASVs that  
263 were indicators of at least two measures of disease severity. The goal of filtering out ASVs that  
264 were indicators of only one disease severity measure was to increase interpretability and reduce  
265 misclassification of ecological roles due to spurious correlations. We then performed functional  
266 classifications of ASVs using the FungalTraits database (Pöhlme et al., 2021). We noted primary  
267 and secondary lifestyles, and where additional functional potential was noted, such as endophytic  
268 capacity, we recorded this as tertiary lifestyle. We also noted “wood saprotroph” as a separate  
269 category, but collapsed other saprotrophic categories (i.e., “unspecified saprotroph,” “litter  
270 saprotroph,” “soil saprotroph”) into a single “saprotroph” designation.

271

## 272 *2.5 Data accessibility*

273 Raw sequence data and associated sample metadata are archived at the NCBI SRA under  
274 BioProject accession PRJNA701888.

275

## 276 **3. Results**

### 277 *3.1 Disease severity and site characteristics*

278 We performed a pairwise cross-correlation analysis using site-level means of disease severity  
279 variables and climactic variables (Table S1). As expected, there were strong correlations between  
280 climate variables and latitude. Specifically, latitude was negatively correlated with heat  
281 accumulation (GDD<sub>4</sub>) in both the growing ( $r = -0.64$ ,  $P = 0.047$ ) and nongrowing season ( $r =$   
282  $-0.95$ ,  $P < 0.001$ ) and with precipitation in the growing season (Spearman’s  $\rho = -0.96$ ,  $P <$

283 0.001). Latitude was also negatively correlated with elevation ( $r = -0.73$ ,  $P = 0.016$ ) with more  
284 southerly sites tending to be at higher elevation. Longitude was not significantly correlated with  
285 the climate variables tested but was strongly positively correlated with duration of BBD infection  
286 ( $r = 0.97$ ,  $P < 0.001$ ) and cankering ( $\rho = 0.83$ ,  $P = 0.003$ ) and negatively with elevation ( $r = -$   
287  $0.69$ ,  $P = 0.03$ ). Various climate parameters correlated with disease severity. Nongrowing season  
288 precipitation was negatively correlated with both scale insect density ( $\rho = -0.88$ ,  $P = 0.001$ ) and  
289 DBH ( $\rho = -0.73$ ,  $P = 0.02$ ), while growing season precipitation was negatively correlated with  
290 scale insect density ( $\rho = -0.81$ ,  $P = 0.005$ ). We found no other significant correlations between  
291 climate and disease severity indicators. There were, however, correlations among some of the  
292 disease severity indicators we measured. Duration of infection correlated positively with  
293 cankering ( $\rho = 0.81$ ,  $P = 0.004$ ), while scale insect density and DBH were also positively  
294 correlated ( $\rho = 0.65$ ,  $P = 0.043$ ). No other correlations with disease severity indicators were  
295 found. We note, however, that the youngest site (Wisconsin, infested in 2010) had high mean  
296 wax density but no visible *Neonectria* perithecia at the time of sampling. We performed pairwise  
297 partial-correlation analysis using nongrowing season precipitation, DBH, and beech scale while  
298 controlling for the effect of the third of these variables in each pairwise combination. Partial  
299 correlation analysis showed that only nongrowing season precipitation and beech scale retained a  
300 significant correlation after controlling for the effect of DBH ( $\rho_{\text{precip, scale, DBH}} = -0.78$ ,  $P = 0.013$ ),  
301 whereas the other relationships were no longer significant ( $\rho_{\text{scale, DBH, precip}} = 0.12$ ,  $P = 0.97$ ;  
302  $\rho_{\text{precip, DBH, scale}} = -0.45$ ,  $P = 0.22$ ).

303

304 *3.2 Sequencing results*

305 After sequence processing and ASV denoising the number of sequences per sample (tree) ranged  
306 from <100 to 331,624 (median 21,315) across 117 samples. The LULU post-processing  
307 algorithm resulted in the identification of 149 ASVs (13% of 1132 original ASVs) that were  
308 better interpreted as variants of existing “parent” ASV’s (either due to minor sequence variation  
309 or sequencing error; Supplementary Table S2). Over 90% of the ASVs culled in this way shared  
310 full taxonomic identity with their respective parent ASVs. For example, the dominant *N. faginata*  
311 and *N. ditissima* ASVs each subsumed 8 and 3 “children” variants respectively with no  
312 taxonomic reassignment. Fourteen ASVs were taxonomically reassigned, but in all cases this  
313 involved reassignment to a higher taxonomic rank (i.e., species designations were removed but  
314 the genus [13 ASVs] or family [1 ASV] was retained). After LULU post-processing and  
315 removing samples with less than 1000 sequences 796 ASVs remained across 102 samples  
316 retained, with the number of ASVs per sample ranging from 12 to 172 (median 60). Rarefying  
317 (to 1000 sequences per sample) led to a further drop in ASV retention; ASVs richness ranged  
318 from 7 to 67 per sample (median 25). The mean ASV richness per site ranged from  $13.2 \pm 4.38$   
319 s.d. to  $46.8 \pm 16.4$  s.d. and total site richness ranged from 66 to 412 ASVs. Further exploration of  
320 the relationships between disease severity, climate, and broad trends in community composition  
321 and diversity are possible using this dataset and are currently underway. We focus here on the  
322 primary fungal disease agents and description of species that may play a role in disease  
323 progression (Table 1).

324

### 325 *3.3 Neonectria species distribution and its drivers*

326 *Neonectria faginata* was present in all ten sites and *N. ditissima* was found in all but the  
327 southernmost site in North Carolina (Fig. 1). Importantly, the two species often co-occurred both

328 at the site level and within the same tree, including within the same 1-cm phloem disc. Overall,  
329 *N. faginata* was present in 135 of 170 phloem plugs (79.4%) and 71 of 102 trees (69.6%), while  
330 *N. ditissima* was present in 46 of 170 plugs (27.1%) and 32 of 102 trees (31.4%). The two  
331 species co-occurred in 38 of 170 plugs (22.4%) and 27 of 102 trees (26.5%) including 35.5% of  
332 the 76 trees infected with at least one species. Both species were absent in 27 of 170 plugs  
333 (15.9%) and 26 of 102 trees (25.5%). At least one of the two species was detected in all 109  
334 plugs where perithecia were present on the plug periderm surface prior to processing for DNA  
335 extraction (64.1% of plugs). *Neonectria faginata* was detected in 107 (98.2%) of the plugs with  
336 fruiting structures present while *N. ditissima* was detected in 31 plugs (29.4%). The species co-  
337 occurred in 29 of 109 plugs (26.6%). Sixty plugs had no perithecia present and one plug of the  
338 170 total had degraded periderm such that it was not possible to record perithecia presence-  
339 absence. Of the 60 plugs with no perithecia at least one species was detected in 33 plugs (55%),  
340 wherein *N. faginata* was detected in 27 (45%) and *N. ditissima* in 15 (25%). The two species co-  
341 occurred in nine plugs without perithecia (15%), and were both absent in 27 plugs (45%).

342 *Neonectria ditissima* was only found in isolation at the tree level (i.e., without *N.*  
343 *faginata*) at the three northernmost sites we sampled (MI, WI, and northern ME). In the  
344 remaining seven of the ten sites, *N. ditissima* was only detected in trees where *N. faginata* was  
345 also present. In terms of species prevalence, *N. faginata* occurred in a greater number of trees  
346 than *N. ditissima* in all but the three northernmost sites (90% mean occurrence versus 25% mean  
347 occurrence for *N. faginata* and *N. ditissima*, respectively, in the seven more southerly sites). The  
348 two species each occurred in isolation in two trees in Wisconsin and co-occurred in one tree, and  
349 in Michigan each species occurred in isolation in one tree and co-occurred in six trees.  
350 *Neonectria ditissima* was more prevalent in our northern Maine site (70% versus 60% of trees



351 for *N. ditissima* and *N. faginata*, respectively, including 50% of trees where the species co-  
352 occurred). In sites within the aftermath zone (i.e., excluding the Wisconsin site within  
353 “advancing front” of the disease), *N. faginata* was detected in 84% of all trees across our sites,  
354 whereas *N. ditissima* was detected in 36% of trees. Given these observed occurrence frequencies,  
355 co-occurrence did not differ from a random distribution (32% observed vs. 30% expected;  $P_{gr} =$   
356 0.24 *sensu* Veech [2013]).

357 We next examined correlations between *Neonectria* species incidence across sites (i.e.,  
358 presence-absence at the tree level) and indices of disease severity and climate using spatially  
359 explicit joint species distribution modeling (HMSC, Ovaskainen et al., 2017). We first tested for  
360 effects of growing season versus nongrowing season climate parameters and found that climate  
361 during the nongrowing season was overall a stronger predictor of patterns of *Neonectria*  
362 occurrence (Supplemental Fig. S1). Specifically, heat accumulation ( $GDD_4$ ) during the  
363 nongrowing season was significantly associated with incidence of both species, while growing  
364 season  $GDD_4$  was generally a poor predictor of incidence. Nongrowing season freeze-thaw was  
365 significantly associated with *N. faginata* (posterior support  $P = 0.99$ ) but not *N. ditissima*  
366 incidence ( $P = 0.86$ ). In the growing season neither of these variables was correlated with  
367 *Neonectria* species occurrence.

368 After controlling for sampling effort and spatial structure, our models explained 54% and  
369 37% of variance in *N. faginata* and *N. ditissima* incidence, respectively, based on Tjur  $R^2$  (Tjur,  
370 2009). The full model indicated that *N. faginata* had a significant, positive relationship with  
371 nongrowing season heat accumulation ( $R^2 = 0.19$ ), duration of infection ( $R^2 = 0.14$ ) and DBH ( $R^2$   
372  $= 0.04$ ), and a negative association with beech scale density ( $R^2 = 0.06$ ) (Fig. 2). Heat  
373 accumulation was the strongest predictor of *N. faginata* incidence ( $R^2 = 0.19$ ). *Neonectria*

374 *ditissima* incidence was positively associated with DBH ( $R^2 = 0.07$ ), freeze-thaw cycle frequency  
375 ( $R^2 = 0.07$ ), and crown dieback ( $R^2 = 0.04$ ), but negatively associated with nongrowing season  
376 heat accumulation ( $R^2 = 0.07$ ) and beech scale density ( $R^2 = 0.05$ ). Results were unchanged when  
377 nongrowing season precipitation was included in the model, except there was no significant  
378 correlation between *N. faginata* and beech scale or infection duration (Fig. S2). Neither species  
379 showed a significant correlation with nongrowing season precipitation. The HMSC approach  
380 also allows examination of residual correlation between dependent variables (i.e., *N. faginata*  
381 and *N. ditissima* occurrence) after accounting for the effect of independent predictors. We found  
382 no residual correlation between the two species after accounting for the effects of disease  
383 severity and climate, and also found no correlation between the species using a reduced model  
384 that only controlled for sampling effort (i.e., sequence count) and spatial structure. This result  
385 suggests that distribution of the two species is not strongly structured by inter-species  
386 interactions (e.g., competition or facilitation).

387         In light of the significant positive association of *N. ditissima* with crown dieback  
388 indicated in HMSC modeling, we visually explored patterns of species incidence across levels of  
389 crown dieback and cankering (Fig. 3). *Neonectria ditissima* occurrence increased across crown  
390 dieback classes (crown dieback level 0 = 21%, 1 = 24%, 2 = 38%, 3 = 58%), whereas *N. faginata*  
391 occurrence was relatively stable or modestly declined (crown dieback level 0 = 79%, 1 = 71%, 2  
392 = 62%, 3 = 67%). The increase in *N. ditissima* with increasing crown dieback resulted in an  
393 increase in co-infection by the two species at the tree level. *Neonectria ditissima* occurred in  
394 isolation in 2-8% of trees in each dieback class, whereas trees co-infected with both *Neonectria*  
395 species increased across dieback classes (crown dieback level 0 = 16%, 1 = 21%, 2 = 31%, 3 =  
396 50%). When discrete cankers were absent both species were at relatively low occurrence (38%

397 and 26% for *N. faginata* and *N. ditissima*, respectively). However, *N. faginata* more than doubled  
398 in trees with cankers compared to no cankers (85% versus 38%, respectively;  $\chi^2 = 21.6$ ,  $P <$   
399 0.001), and *N. ditissima* doubled in the highest cankering level compared to levels 0-2 (50%  
400 versus 25%, respectively;  $\chi^2 = 5.1$ ,  $P = 0.02$ ) resulting in elevated co-infection at the highest  
401 cankering category (46% of trees compared to 17-23% in remaining categories).

402 In this work we were also interested in whether *N. faginata* or *N. ditissima* was  
403 structuring or responding to different fungal endophyte communities. Of the 62 most commonly  
404 detected ASVs (minimum 10% incidence across all samples) *N. faginata* was the fifth best  
405 predictor of mycobiome composition (PERMANOVA  $R^2 = 0.076$ ,  $P = 0.001$ ) while *N. ditissima*  
406 was the 42<sup>nd</sup> best predictor ( $R^2 = 0.023$ ,  $P = 0.007$ ; Supplemental Fig. S3A). We tested for a  
407 relationship between PERMANOVA  $R^2$  and sample incidence to examine the possibility that  
408 species presence-absence effects on community composition were primarily driven by the  
409 frequency of ASV occurrence. There was a weak but significant relationship between incidence  
410 and PERMANOVA  $R^2$  ( $R^2 = 0.165$ ,  $P = 0.001$ ; Supplemental Fig. S3B) with the top five most  
411 predictive ASVs occurring in between 13% and 61% of samples.

412

### 413 3.3 Ecological roles of fungi in the BBD system

414 We used a combination of Indicator Species Analysis (ISA; de Caceres and Legendre 2009) and  
415 literature-based functional classification (Pölme et al., 2021) to discern degrees of statistical  
416 association and potential ecological roles for fungal species that appear as beech bark endophytes  
417 across the range of disease and tree decline levels sampled. Overall, 38 ASVs were identified as  
418 indicator species of at least two disease categories. All but two of these ASVs were indicators of  
419 different levels of crown dieback or cankering (Table 3). Nine of the 38 were indicators of the

420 absence of crown dieback and either low levels of cankering or the absence of scale insect (see  
421 Table 3, “Healthy beech” indicators). Of these nine, only three were taxonomically identified to  
422 the genus level, with six other ASVs identified to order, phylum or kingdom. Another five ASVs  
423 were indicators of both low levels of cankering and absence of scale insect (Table 3, “Minor  
424 cankering, scale absent”), with two being taxonomically identified to the genus level.

425 In total, 16 ASVs were associated with intermediate to high levels of either cankering or  
426 crown dieback. Six ASVs were indicators of intermediate to high levels of cankering, low scale  
427 density, and/or presence of *Neonectria* species (Table 3, “Intermediate BBD pressure”). These  
428 included *N. faginata*, as well as ASVs annotated as animal pathogens/entomopathogens,  
429 mycoparasites, plant pathogens, and saprotrophs or wood saprotrophs, the latter two functional  
430 groupings accounting for five of the six ASVs. Ten ASVs were indicators of intermediate to high  
431 levels of crown dieback (Table 3, “High BBD pressure”). Four of these ten were also indicators  
432 of high scale density, and another four were indicators of high levels of cankering. Eight of the  
433 ten ASVs associated with high levels of crown dieback were annotated as either saprotrophs or  
434 wood saprotrophs, and five were annotated as plant pathogens. All five of the ASVs assigned a  
435 plant pathogen function mapped to multiple functional groups, with saprotrophic lifestyle  
436 assigned as primary or secondary functions. Three ASVs associated with high levels of crown  
437 dieback were also among the top five predictors of community composition (Supplemental Fig.  
438 S3), and were annotated to entomopathogen (animal pathogen), plant pathogen-saprotroph-  
439 mycoparasite, or saprotroph-plant pathogen-endophyte functions, respectively. We note that *N.*  
440 *ditissima* was also an indicator of high levels of crown dieback (crown dieback 2-3) but was not  
441 formally included in this analysis due to lack of association with additional disease indicators.

442 Eight ASVs were associated with presence or absence of the primary disease agents  
443 (Table 3, “Scale and *Neonectria* associates”), including ASVs associated with high beech scale  
444 density and *Neonectria* absence (two ASVs), high density of both beech scale and *Neonectria*  
445 perithecia (one ASV), or absence of both beech scale and *Neonectria* (one ASV). Six of the eight  
446 were also associated with absence of cankering. Five of these eight ASVs were annotated to  
447 saprotroph or wood saprotroph functions, three as entomopathogens/animal pathogen, and two as  
448 endophytes, including three ASVs with multiple functional mappings.

449 We also specifically explored the distributions of *Clonostachys rosea*, *Nematogonium*  
450 *ferrugineum*, and *Fusarium babinda* given their previously described roles as BBD associates as  
451 either mycoparasites of *Neonectria* (*C. rosea* and *N. ferrugineum*; Barnett and Lilly 1962;  
452 Houston, 1983; Stauder et al., 2020a) or potential entomopathogens or secondary beech  
453 pathogens (Stauder et al., 2020a). Two ASVs were annotated as *C. rosea* and together they  
454 occurred in four of our ten sites ranging from 10% to 27% of trees in respective sites (Fig. 4A).  
455 One of these ASVs was also an indicator of the highest level of *Neonectria* perithecia. One ASV  
456 of putative importance as a mycoparasite of the BBD fungi, *N. ferrugineum*, only occurred at two  
457 sites at low frequency (9 and 20% of trees Fig. 4B) and was not a statistical indicator of any  
458 disease categories. Another ASV (ASV 19) was identified as *Fusarium babinda*, which has been  
459 previously identified in association with BBD and is a suspected beech scale associate (Stauder  
460 et al., 2020a). This ASV was associated with high wax density and high crown dieback (Table 3)  
461 and occurred in all ten of our sites (Fig. 4C).

462

#### 463 **4. Discussion**

464 In the present study we explored the distribution of *N. faginata* and *N. ditissima*, the  
465 primary pathogens involved in BBD, in relation to disease severity and climate characteristics in  
466 ten sites across the range of BBD. We further explored patterns of association with other fungal  
467 species in the beech bark endophytic community in relation to tree disease state, and used these  
468 relationships to highlight and hypothesize ecological roles of potential relevance to BBD severity  
469 and progression. We show that *N. faginata* and *N. ditissima* have divergent correlations with  
470 climate and may be associated with different stages of tree decline. Further, we show that fungal  
471 species occurring in association with the primary BBD agents (i.e., the host, *F. grandifolia*; the  
472 scale insect initiating agent, *C. fagisuga*, and the fungal pathogens, *N. faginata* and *N. ditissima*)  
473 may contribute to disease outcomes in complex and interacting ways in this system. We suspect  
474 that these types of feedbacks are not unique to BBD dynamics but rather are likely to generalize  
475 to other complex tree diseases.

476

#### 477 *4.1 Correlations among disease agents and climate*

478 We found that precipitation in both growing and nongrowing seasons was negatively  
479 correlated with scale insect density. Nongrowing season precipitation correlated negatively with  
480 DBH. The former of these correlations is consistent with a hypothesized causal relationship  
481 whereby precipitation reduce scale insect population density by washing colonies off of tree  
482 boles (Houston and Valentine, 1988; Dukes et al., 2009; Garnas et al., 2011b; Kasson and  
483 Livingston, 2012). The latter relationship between precipitation and DBH is likely driven by  
484 multicollinearity between infection duration (and thus disease severity indicators), geographic  
485 distribution, and climate. Sites with older infections tend to be dominated by small diameter trees  
486 and also occur in lower precipitation sites in our dataset. That said, cankering (which constitutes

487 evidence of past, non-lethal infection) was the only index of disease status that was related  
488 statistically (positively in this case) with duration of infection. Our dataset included sites ranging  
489 from nine to 68 years from the arrival of beech scale based on county-level data (Cale et al.,  
490 2017), but only one site was in the “advancing front” stage of infection as typically defined (i.e.,  
491  $\leq 10$  years post scale insect arrival; Houston et al., 2005). At least one further site, and possibly  
492 up to three sites, occurred in the “killing front” stage of infection (i.e., 5-10 years after advancing  
493 front conditions, or 15-20 years after scale insect arrival; Houston et al., 2005), whereas the  
494 remaining sites were sampled in an aftermath forest infection stage. Interactions between disease  
495 agents are variable in aftermath forests despite density dependent growth within populations of  
496 insects or fungi (Garnas et al., 2011a). Our sampling design, which was weighted towards  
497 aftermath forest stands, may have obscured the typically observed patterns across disease stages  
498 in beech scale and fungal pathogen abundance. However, there were signals of duration of  
499 infection-driven patterns in our dataset. For example, our advancing front site had high mean  
500 wax density but no visible *Neonectria* perithecia production, as is typical of advancing front  
501 stage forests (Shigo, 1972; Garnas et al., 2013). Further, scale insect density and DBH were  
502 positively correlated, largely because sites with younger infections – and thus higher beech scale  
503 density associated with earlier disease stages – also tended to have larger trees. Relationships  
504 between scale insect densities within the aftermath forest alone are considerably weaker (Garnas  
505 et al., 2011b).

506

#### 507 *4.2 Neonectria species distribution and its drivers*

508 Both *Neonectria* species were widely distributed geographically and in terms of disease  
509 stage (i.e., infection duration). *Neonectria faginata* was detected in all ten sites, and *N. ditissima*

510 in nine of ten sites, with both occurring in advancing front, killing front, and aftermath forests.  
511 Importantly, the two species regularly co-occurred, not only within the same tree (26% co-  
512 occurrence), but within the same 1-cm phloem disc (22% co-occurrence). The prevailing  
513 understanding of the dynamics BBD is that infected stands undergo a progression from initial  
514 infection by *N. ditissima* to near-total replacement by *N. faginata* in later disease stages in most  
515 cases (Houston et al., 1994; Cale et al., 2017). This idea persists despite evidence of *N. ditissima*  
516 persistence and co-occurrence of the two pathogens (Kasson and Livingston, 2009). Here we  
517 show that while *N. faginata* is the dominant species throughout killing front and aftermath  
518 forests (84% of all trees), *N. ditissima* maintained a substantial foothold throughout these stands  
519 (36% of all trees). Further, based on patterns of co-occurrence, it appears that these two species  
520 are distributed approximately randomly with respect to one another (i.e., no evidence of strong  
521 facilitation such that co-infection frequency would be elevated, nor obvious competitive  
522 exclusion within sites or trees). Previous studies have found little evidence for co-occurrence  
523 (e.g., Cale et al., 2015), but our data suggest that the two species co-occur at much higher rates  
524 than previously known.

525 High rates of co-occurrence were not universal, however. For example, we did find  
526 evidence that *N. faginata* becomes more prevalent relative to *N. ditissima* as disease progresses  
527 over decades. However, this appears to reflect an increase in prevalence of *N. faginata* and not  
528 the reduction or displacement of *N. ditissima*. Generally, the two species appear to have  
529 divergent climate associations, where *N. faginata* was associated with warmer climates, and *N.*  
530 *ditissima* with colder climates. It is possible that these patterns arise from infection duration  
531 dynamics that are obscured by our use of coarse-grained county level data. For example,  
532 northern Maine has experienced secondary killing fronts after release of beech scale populations



533 from suppression by winter killing temperatures as temperature warms (Kasson and Livingston,  
534 2012). However, the two warmest sites in our dataset were also of intermediate infection  
535 duration (19 and 20 years) and so infection duration is unlikely to fully explain the climate-  
536 driven distribution patterns we observed. Indeed, nongrowing season heat accumulation was the  
537 strongest predictor of *N. faginata* occurrence while infection duration was the second strongest  
538 predictor, suggesting climate as an important influence on prevalence of these species within the  
539 BBD system.

540 Other factors may help reconcile differences when comparing relative species prevalence  
541 from previous studies of *N. faginata* and *N. ditissima*. Stauder et al. (2020b) discussed a  
542 perithecium-dependent sampling bias, since environmental conditions and time required for  
543 perithecium production may significantly differ between these two fungi despite both being  
544 heterothallic. For example, results from a large survey of *N. faginata* and *N. ditissima* sampled  
545 from perithecia on American beech across the central Appalachian Mountains found *N. ditissima*  
546 represented just 4.2% of perithecial isolates and was recovered from only two of 13 sampled  
547 locations (Stauder et al., 2020a). This may indicate a delay in perithecium production by *N.*  
548 *ditissima* that favors *N. faginata* ascocarp formation or a difference in temperature optima that  
549 generally favors *N. faginata* except in the most northern stands. Further, based on our  
550 measurements of species detection rates and perithecia presence on plug periderm, if only  
551 perithecia are sampled and *N. faginata* is always detected from perithecia (assumption), then *N.*  
552 *ditissima* would only be detected in 1.8% of samples, whereas *N. faginata* would be detected in  
553 the remaining 98.2% of samples. This is not far from actual field detection rates. This suggests  
554 considerable bias against detecting *N. ditissima*, which is actually present in 29% of perithecial  
555 samples and 27% of all perithecial and non-perithecial samples. Another possibility is that

556 mycoparasitic fungi detailed in this study may preferentially parasitize *N. ditissima*.  
557 Interestingly, the only site from which *Clonostachys rosea* was recovered in West Virginia in a  
558 previous study also had the highest incidence of *N. ditissima* (Stauder et al., 2020a). A second  
559 fungus, *Fusarium babinda*, may also interact differentially with *N. faginata* and *N. ditissima*.  
560 This fungus has previously been recovered from *Neonectria perithecia* (Kasson and Livingston,  
561 2009; Stauder et al., 2020a), possibly suggesting it opportunistically colonizes these tissues  
562 (though we note that perithecia were removed from our samples prior to DNA extraction in the  
563 current study). Nevertheless, both time course studies on perithecium production and co-plating  
564 assays are needed to further resolve these relationships.

565 Both *Neonectria* species exhibited significant associations with various disease severity  
566 metrics. For example, both species were negatively correlated with beech scale density. Despite  
567 the fact that scale insects appear to be obligate initiating agents of BBD, Garnas et al. (2013)  
568 found negative correlations between distributions of the *Neonectria* species and scale insect. Our  
569 data appears to support this pattern. Occurrence of *N. ditissima* but not *N. faginata* was positively  
570 correlated with crown dieback class, a result supported by both HMSC modeling and indicator  
571 species analysis (ISA). This pattern resulted in increased co-infection by the two species in  
572 higher crown-dieback classes. Higher rates of co-infection associated with increasing crown  
573 dieback may indicate that a synergistic attack by the two species contributes to tree decline. For  
574 example, given different temperature associations, relatively greater activity during cooler  
575 temperatures in the nongrowing season may allow *N. ditissima* to attack hosts during periods of  
576 dormancy when defenses such as wound compartmentalization (Manion, 2003) are compromised  
577 (Copini et al., 2014). Alternatively, *N. ditissima* may be more prevalent in later stages of tree  
578 decline as a secondary pathogen that is favored by weakened host tissue (Houston, 1981;

579 Manion, 1981). Indeed, *N. faginata* was among the top five predictors of community  
580 composition of the bark endophyte community overall, whereas *N. ditissima* was a relatively  
581 poor predictor, suggesting that colonization by *N. faginata* may be a predisposing factor for  
582 colonization of bark by a suite of other disease-associated fungi. However, the two species  
583 produced similar sized cankers on American beech in inoculation trials (Stauder et al., 2020a)  
584 suggesting that *N. ditissima* is not restricted to tissues already weakened by primary *N. faginata*  
585 infection.

586

#### 587 *4.3 Ecological roles of fungi in the BBD system*

588 We used a combination of ISA and literature searches to describe the ecological roles of  
589 fungi occurring in the context of the BBD complex. ISA delineated clear groups of fungi  
590 associated with different stages of disease or disease agents, including healthy beech associates,  
591 fungi associated with intermediate or high levels of BBD pressure and tree decline, and fungi  
592 associated with presence and/or absence of the primary disease agents (i.e., *Neonectria* and  
593 beech scale). The majority of healthy beech associates were not taxonomically identified past the  
594 order level (67%). In addition, only 40% of ASVs associated with low levels of cankering and  
595 absence of beech scale were identified past the order level. Of the 24 remaining indicator ASVs  
596 96% (23 ASVs) were taxonomically identified to at least the genus level, suggesting that bark  
597 endophytic communities of healthy American beech are a relatively unexplored reservoir of  
598 fungal diversity given comparatively low taxonomic identification. Bark endophytes have  
599 historically received less attention than foliar endophytes in temperate forests (Unterseher,  
600 2011), and further exploration of bark endophyte diversity and functioning is warranted.

601           We observed a shift in both taxonomic composition and functional potential in the  
602 indicators of intermediate to high BBD pressure compared to healthy beech. Overall, 13 of the  
603 16 ASVs (81%) associated with intermediate to high BBD pressure were annotated to  
604 saprotrophic functional groups, and five of the putatively saprotrophic ASVs associated with  
605 high BBD pressure were further identified as facultative plant pathogens. Four ASVs in  
606 intermediate- and high BBD pressure categories, including *N. faginata*, were also among the top  
607 five predictors of community composition. Many endophytes and plant pathogens function as  
608 facultative saprotrophs (Frankland, 1998; Stone et al., 2004); a shift in community function  
609 towards saprotrophy may be an important indicator of later stages of tree decline. The fungal  
610 communities associated with late stages of tree decline in particular, as indicated by high levels  
611 of crown dieback, may contribute to tree death by weakening tissues to the point of mechanical  
612 failure (Houston, 1981; Manion, 1981). Together, enrichment of saprotrophs and plant pathogens  
613 along with an apparent consistent shift in community composition indicate that the endophytic  
614 fungal community may play an important role in disease progression beyond the direct action of  
615 the primary disease agents.

616           We observed eight ASVs that were associated with presence or absence of the primary  
617 disease agents (*Neonectria* and beech scale). It is difficult to assign ecological roles or the nature  
618 of interactions based on pairwise species associations. For example, a positive correlation  
619 between species may indicate facilitation, overlapping habitat or microclimatic preferences, or  
620 may indicate deadlocked competition or mycoparasitic relationships (Maynard et al., 2018).  
621 Indeed, some of the ASVs in this group were associated with high beech scale density and  
622 absence of *Neonectria*, or vice versa. Two of these (ASVs 27 and 234) were restricted  
623 geographically – occurring primarily in our Wisconsin site, which, at nine years infection

624 duration, was unique in our dataset with high average beech scale density and low *Neonectria*  
625 incidence. As such, these two ASVs may be indicators of early-stage BBD infection or  
626 geographic location rather than of interactions with beech scale or *Neonectria*, *per se*. However,  
627 two other ASVs (ASVs 69 and 217) that were geographically widespread, occurring in 4-5 sites,  
628 were both indicators of beech scale absence, with one also being an indicator of high *Neonectria*  
629 perithecium density and the other an indicator of *Neonectria* absence. It is possible that these  
630 taxa function as facultative entomopathogens/mycoparasites depending on BBD disease stage  
631 and available hosts.

632 We also examined distribution of two species previously reported as mycoparasites (*N.*  
633 *ferrugineum* and *C. rosea*) and one reported as a potential additional plant pathogen and/or an  
634 entomopathogen (*F. babinda*) in the BBD system. One of these, *N. ferrugineum* (ASV 807)  
635 occurred at only two sites and was not a statistical indicator of any disease categories. Despite its  
636 prevalence in visual surveys (Houston, 1983) our data suggest that given its relative rarity, this  
637 fungus may not play a primary role in limiting growth of *Neonectria* pathogens involved in  
638 BBD. In contrast, two ASVs were identified as *C. rosea*, which together were detected at four of  
639 our ten sites including recently infested sites in Wisconsin and Michigan, suggesting this fungus  
640 is present in BBD-affected forest stands even at the earliest stages of *Neonectria* establishment.  
641 In addition, one of the *C. rosea* ASVs was an indicator of high *Neonectria* perithecia density,  
642 consistent with its hypothesized mycoparasitic status in this system (Stauder et al., 2020a). This  
643 species has long been used as a biocontrol agent against plant pathogenic fungi (Schroers et al.,  
644 1999). Genomic mechanisms of mycoparasitism have also been described in this species  
645 (Karlsson et al., 2015) making this an intriguing candidate for further study in terms of  
646 interactions with the primary *Neonectria* disease agents. *Fusarium babinda* (ASV 19) was an

647 indicator of high BBD pressure and was found at all ten of our sites, suggesting this fungus is a  
648 geographically widespread and consistent member of late-stage decline communities associated  
649 with BBD. In particular, *F. babinda* was associated with high wax density supporting its  
650 hypothesized association with beech scale (Stauder et al., 2020a). Whether this fungus is  
651 parasitizing the scale insects remains unclear. Previous literature supports a possible  
652 entomopathogenic lifestyle, having been previously recovered from other non-native forest  
653 insect pests (*Lymantria dispar* and *Adelges tsugae*) in the eastern U.S. (Jacobs-Venter et al.,  
654 2018).

655

#### 656 *4.4 Significance outside the BBD pathosystem*

657 The results of this study provide novel insights into a well-studied disease that has seen  
658 definitive, albeit incremental progress in its understanding since its discovery 130 years ago. The  
659 independent confirmation of a recently uncovered widespread fungus, *F. babinda*, associated  
660 with beech scale opens the door for functional studies and bioassays to confirm the ecology of  
661 this suspected entomopathogen. Its obscurity up until this point across BBD-impacted forests  
662 belies its relatively high incidence. Such observations highlight the importance of high-  
663 throughput amplicon sequencing in well-studied pathosystems, where causal agents are thought  
664 to be well understood.

665 A primary finding of this study – one that counters the conventional understanding of this  
666 system – is that *N. ditissima* is not only present in many stands but often co-occurs with *N.*  
667 *faginata* in the same trees, perhaps contributing to enhanced disease severity. *Neonectria*  
668 *faginata* is known only from beech in North America yet it has never been found outside of  
669 BBD-infected stands. Applying the findings of this study to other *Neonectria* and *Corinectria*

670 canker disease systems has potential to uncover a native reservoir for *N. faginata*, which not  
671 unlike *N. ditissima* on beech, might be less competitive on other host substrates. Such differences  
672 in fruiting abundance are already known for *N. ditissima*: perithecium production is high on *Acer*  
673 *pensylvanicum* compared to limited production on *Ilex mucronata* and *Sorbus americana* and no  
674 confirmed production on *Liquidambar styraciflua* (Stauder et al., 2020a; Kasson and Stauder,  
675 unpublished observations). Since *N. ditissima* is present on over one quarter of infected beech  
676 trees, the potential for amplification of spillover of this pathogen in ways that influence non-  
677 beech hosts could also be an important mechanism by which this disease impacts forest structure,  
678 function, and diversity.

679

#### 680 4.5 Conclusions

681 Here we described new aspects of the ecology of the two primary fungal pathogens of BBD, *N.*  
682 *faginata* and *N. ditissima*. In particular, *N. ditissima* occurs far more widely than previously  
683 known, co-occurring with *N. faginata* in nearly all of the sites we examined including within the  
684 same tree and even the same 1-cm phloem disc. The two species have apparently contrasting  
685 climate associations with *N. faginata* being associated with warmer temperatures and *N.*  
686 *ditissima* with cooler temperatures. Further, the two species appear to have different  
687 contributions to disease – our data suggest that *N. ditissima* becomes more prevalent in later  
688 stages of tree decline potentially indicating increased importance as trees progress through stages  
689 of the decline cycle. We also identified categories of fungi that may alter the trajectory of disease  
690 by functioning as entomopathogens, mycoparasites, saprotrophs and/or alternate or additional  
691 pathogens, thus causing downstream shifts in community composition in the fungal communities  
692 of beech bark.

693

694 **Acknowledgements**

695 This work was funded in part by the New Hampshire Agricultural Experiment Station. This is  
696 Scientific Contribution Number \_\_\_\_\_. This work was supported by the USDA National Institute  
697 of Food and Agriculture McIntire-Stennis Project \_\_\_\_\_. We thank Paul Super and Bambi Teague  
698 at the National Parks Service in North Carolina as well as Keith Kanoti at the University of  
699 Maine for their help in obtaining collection permits. We also appreciate the cooperation of the  
700 New York, Michigan, Pennsylvania, and Wisconsin Departments of Natural Resources for  
701 granting collection permits.

702

703



704 **References**

- 705 Barnett, H. L., and Lilly, V. G. (1962). A Destructive Mycoparasite, *Gliocladium Roseum*.  
706 *Mycologia* 54, 72–77. doi:[10.1080/00275514.1962.12024980](https://doi.org/10.1080/00275514.1962.12024980).
- 707 Cale, J. A., Garrison-Johnston, M. T., Teale, S. A., and Castello, J. D. (2017). Beech bark disease  
708 in North America: Over a century of research revisited. *Forest Ecology and Management*  
709 394, 86–103. doi:[10.1016/j.foreco.2017.03.031](https://doi.org/10.1016/j.foreco.2017.03.031).
- 710 Cale, J. A., Teale, S. A., Johnston, M. T., Boyer, G. L., Perri, K. A., and Castello, J. D. (2015).  
711 New ecological and physiological dimensions of beech bark disease development in  
712 aftermath forests. *Forest Ecology and Management* 336, 99–108.  
713 doi:[10.1016/j.foreco.2014.10.019](https://doi.org/10.1016/j.foreco.2014.10.019).
- 714 Callahan, B. J., McMurdie, P. J., Rosen, M. J., Han, A. W., Johnson, A. J. A., and Holmes, S. P.  
715 (2016). DADA2: High-resolution sample inference from Illumina amplicon data. *Nat*  
716 *Methods* 13, 581–583. doi:[10.1038/nmeth.3869](https://doi.org/10.1038/nmeth.3869).
- 717 Castlebury, L. A. C. A., Rossman, A. Y. R. Y., and Hyten, A. S. H. S. (2006). Phylogenetic  
718 relationships of *Neonectria/Cylindrocarpon* on *Fagus* in North America  
719 Mention of trade names or commercial products in this article is solely for the purpose of providing specific  
720 information and does not imply recommendation or endorsement by the US Department of  
721 Agriculture. *Botany*. doi:[10.1139/b06-105](https://doi.org/10.1139/b06-105).
- 722 Copini, P., den Ouden, J., Decuyper, M., Mohren, G. M. J., Loomans, A. J. M., and Sass-  
723 Klaassen, U. (2014). Early wound reactions of Japanese maple during winter dormancy: the  
724 effect of two contrasting temperature regimes. *AoB Plants* 6. doi:[10.1093/aobpla/plu059](https://doi.org/10.1093/aobpla/plu059).
- 725 Cotter H. V., and Blanchard R. O. (1981). Identification of the two *Nectria* taxa causing bole  
726 cankers on American beech. *Plant Disease*, 65(4):332-334.

- 727 Desprez-Loustau M. L., Aguayo J., Dutech C., Hayden K. J., Husson C., Jakushkin B., Marçais  
728 B., Piou D., Robin C., Vacher C. (2016). An evolutionary ecology perspective to address  
729 forest pathology challenges of today and tomorrow. *Annals of Forest Science*. 73(1):45-67.
- 730 De Caceres, M., Legendre, P. (2009). Associations between species and groups of sites: indices  
731 and statistical inference. *Ecology*, doi: 10.1890/08-1823.1
- 732 Dukes, J. S. D. S., Pontius, J. P., Orwig, D. O., Garnas, J. R. G. R., Rodgers, V. L. R. L., Brazee,  
733 N. B., et al., (2009). Responses of insect pests, pathogens, and invasive plant species to  
734 climate change in the forests of northeastern North America: What can we predict? This  
735 article is one of a selection of papers from NE Forests 2100: A Synthesis of Climate  
736 Change Impacts on Forests of the Northeastern US and Eastern Canada. *Canadian Journal*  
737 *of Forest Research*. doi:[10.1139/X08-171](https://doi.org/10.1139/X08-171).
- 738 Edgar, R. C. (2013). UPARSE: highly accurate OTU sequences from microbial amplicon reads.  
739 *Nat Methods* 10, 996–998. doi:[10.1038/nmeth.2604](https://doi.org/10.1038/nmeth.2604).
- 740 Ehrlich, J. (2011). The beech bark disease: a *Nectria* disease of *Fagus*, following *Cryptococcus*  
741 *fagi* (BAER.). *Canadian Journal of Research*. doi:[10.1139/cjr34-070](https://doi.org/10.1139/cjr34-070).
- 742 Feau, N., and Hamelin, R. C. (2017). Say hello to my little friends: how microbiota can modulate  
743 tree health. *New Phytologist* 215, 508–510. doi:<https://doi.org/10.1111/nph.14649>.
- 744 Frankland, J. C. (1998). Fungal succession — unravelling the unpredictable. *Mycological*  
745 *Research* 102, 1–15. doi:[10.1017/S0953756297005364](https://doi.org/10.1017/S0953756297005364).
- 746 Frøslev, T. G., Kjøller, R., Bruun, H. H., Ejrnæs, R., Brunbjerg, A. K., Pietroni, C., et al., (2017).  
747 Algorithm for post-clustering curation of DNA amplicon data yields reliable biodiversity  
748 estimates. *Nat Commun* 8, 1–11. doi:[10.1038/s41467-017-01312-x](https://doi.org/10.1038/s41467-017-01312-x).

- 749 Garnas, J. R., Ayres, M. P., Liebhold, A. M., and Evans, C. (2011b). Subcontinental impacts of  
750 an invasive tree disease on forest structure and dynamics. *Journal of Ecology* 99, 532–541.  
751 doi:<https://doi.org/10.1111/j.1365-2745.2010.01791.x>.
- 752 Garnas, J. R., Houston, D. R., Ayres, M. P., and Evans, C. (2011a). Disease ontogeny  
753 overshadows effects of climate and species interactions on population dynamics in a  
754 nonnative forest disease complex. *Ecography* 35, 412–421.  
755 doi:<https://doi.org/10.1111/j.1600-0587.2011.06938.x>.
- 756 Garnas, J. R., Houston, D. R., Twery, M. J., Ayres, M. P., and Evans, C. (2013). Inferring  
757 controls on the epidemiology of beech bark disease from spatial patterning of disease  
758 organisms. *Agricultural and Forest Entomology* 15, 146–156.  
759 doi:<https://doi.org/10.1111/j.1461-9563.2012.00595.x>.
- 760 Gómez-Cortecero, A., Saville, R. J., Scheper, R. W. A., Bowen, J. K., Agripino De Medeiros, H.,  
761 Kingsnorth, J., et al., (2016). Variation in Host and Pathogen in the *Neonectria/Malus*  
762 Interaction; toward an Understanding of the Genetic Basis of Resistance to European  
763 Canker. *Front Plant Sci* 7. doi:[10.3389/fpls.2016.01365](https://doi.org/10.3389/fpls.2016.01365).
- 764 Griffith, D. M., Veech, J. A., and Marsh, C. J. (2016). cooccur: Probabilistic Species Co-  
765 Occurrence Analysis in R. *Journal of Statistical Software* 69, 1–17.  
766 doi:[10.18637/jss.v069.c02](https://doi.org/10.18637/jss.v069.c02).
- 767 Harrell, F.E. Jr, Dupont, C. et al., (2019). Hmisc: Harrell Miscellaneous. R package version 4.3-  
768 0. <https://CRAN.R-project.org/package=Hmisc>
- 769 Houston, D. R. (1981). *Stress Triggered Tree Diseases: The Diebacks and Declines*. U.S.  
770 Department of Agriculture, Forest Service.

- 771 Houston, D. R. (1983). Effects of parasitism by *Nematogonum ferrugineum* (*Gonstorrhodiella*  
772 *highlei*) on pathogenicity of *Nectria coccinea* var. *faginata* and *Nectria galligena*. In:  
773 *Proceedings, I.U.F.R.O. Beech Bark Disease Working Party Conference; 1982 September*  
774 *26-October 8; Hamden, CT. Sponsored by the USDA Forest Service, Northeastern Forest*  
775 *Experiment Station. Gen. Tech. Rep. WO-37. [Washington, DC]: U.S. Department of*  
776 *Agriculture, Forest Service: 109-114. 37, 109–114.*
- 777 Houston, D.R., Mahoney, E.M. and McGauley, B.H., 1987, November. Beech bark disease –  
778 association of *Nectria ochroleuca* in W VA, PA, and Ontario. In *Phytopathology* (Vol. 77,  
779 No. 11, pp. 1615-1615). 3340 Pilot Knob Road, St. Paul, MN 55121: Amer  
780 Phytopathological Soc.
- 781 Houston, D. R. (1994). Major new tree disease epidemics: beech bark disease. *Annu. Rev.*  
782 *Phytopathol.* 32, 75–87. doi:[10.1146/annurev.py.32.090194.000451](https://doi.org/10.1146/annurev.py.32.090194.000451).
- 783 Houston, D. R., Rubin, B. D., Twery, M. J., Steinman, J. R., and Steinman, J. R. (2005). Spatial  
784 and Temporal Development of Beech Bark Disease in the Northeastern United States. In:  
785 *Evans, Celia A., Lucas, Jennifer A. and Twery, Mark J., eds. Beech Bark Disease:*  
786 *Proceedings of the Beech Bark Disease Symposium; 2004 June 16-18; Saranak Lake, NY.*  
787 *Gen. Tech. Rep. NE-331. Newtown Square, PA: US. Department of Agriculture, Forest*  
788 *Service, Northeastern Research Station: 43-47. Available at:*  
789 <https://www.fs.usda.gov/treearch/pubs/20405> [Accessed November 24, 2020].
- 790 Houston, D. R., and Valentine, H. T. (2011). Beech bark disease: the temporal pattern of  
791 cankering in aftermath forests of Maine. *Canadian Journal of Forest Research.*  
792 doi:[10.1139/x88-007](https://doi.org/10.1139/x88-007).

- 793 Jacobs-Venter, A., Laraba, I., Geiser, D. M., Busman, M., Vaughan, M. M., Proctor, R. H., et al.,  
794 (2018). Molecular systematics of two sister clades, the *Fusarium concolor* and *F. babinda*  
795 species complexes, and the discovery of a novel microcycle macroconidium–producing  
796 species from South Africa. *Mycologia* 110, 1189–1204.  
797 doi:[10.1080/00275514.2018.1526619](https://doi.org/10.1080/00275514.2018.1526619).
- 798 Karlsson, M., Durling, M. B., Choi, J., Kosawang, C., Lackner, G., Tzelepis, G. D., et al.,  
799 (2015). Insights on the Evolution of Mycoparasitism from the Genome of *Clonostachys*  
800 *rosea*. *Genome Biol Evol* 7, 465–480. doi:[10.1093/gbe/evu292](https://doi.org/10.1093/gbe/evu292).
- 801 Kasson, M. T., and Livingston, W. H. (2009). Spatial distribution of *Neonectria* species  
802 associated with beech bark disease in northern Maine. *Mycologia* 101, 190–195.  
803 doi:[10.3852/08-165](https://doi.org/10.3852/08-165).
- 804 Kasson, M. T., and Livingston, W. H. (2012). Relationships among beech bark disease, climate,  
805 radial growth response and mortality of American beech in northern Maine, USA. *Forest*  
806 *Pathology* 42, 199–212. doi:<https://doi.org/10.1111/j.1439-0329.2011.00742.x>.
- 807 Kolp, M., Double, M. L., Fulbright, D. W., MacDonald, W. L., and Jarosz, A. M. (2020). Spatial  
808 and temporal dynamics of the fungal community of chestnut blight cankers on American  
809 chestnut (*Castanea dentata*) in Michigan and Wisconsin. *Fungal Ecology* 45, 100925.  
810 doi:[10.1016/j.funeco.2020.100925](https://doi.org/10.1016/j.funeco.2020.100925).
- 811 Manion, P. D. (1981). Tree disease concepts. *Tree disease concepts*. Available at:  
812 <https://www.cabdirect.org/cabdirect/abstract/19810672031> [Accessed February 10, 2021].
- 813 Manion, P. D. (2003). Evolution of Concepts in Forest Pathology. *Phytopathology*® 93, 1052–  
814 1055. doi:[10.1094/PHYTO.2003.93.8.1052](https://doi.org/10.1094/PHYTO.2003.93.8.1052).

815 Maynard, D. S., Covey, K. R., Crowther, T. W., Sokol, N. W., Morrison, E. W., Frey, S. D., et  
816 al., (2018). Species associations overwhelm abiotic conditions to dictate the structure and  
817 function of wood-decay fungal communities. *Ecology* 99, 801–811. doi:[10.1002/ecy.2165](https://doi.org/10.1002/ecy.2165).

818 Morin, R. S. M. S., Liebhold, A. M. L. M., Tobin, P. C. T. C., Gottschalk, K. W. G. W., and  
819 Luzader, E. L. (2007). Spread of beech bark disease in the eastern United States and its  
820 relationship to regional forest composition. *Canadian Journal of Forest Research*.  
821 doi:[10.1139/X06-281](https://doi.org/10.1139/X06-281).

822 Nilsson, R. H., Larsson, K.-H., Taylor, A. F. S., Bengtsson-Palme, J., Jeppesen, T. S., Schigel,  
823 D., et al., (2019). The UNITE database for molecular identification of fungi: handling dark  
824 taxa and parallel taxonomic classifications. *Nucleic Acids Res* 47, D259–D264.  
825 doi:[10.1093/nar/gky1022](https://doi.org/10.1093/nar/gky1022).

826 Oksanen, J., F. Blanchet, G., Friendly, M., Kindt, R., Legendre, P., McGlinn, D., et al., (2019).  
827 vegan: Community Ecology Package. R package version 2.5-6. [https://CRAN.R-](https://CRAN.R-project.org/package=vegan)  
828 [project.org/package=vegan](https://CRAN.R-project.org/package=vegan)

829 Ovaskainen, O., Roy, D. B., Fox, R., and Anderson, B. J. (2016). Uncovering hidden spatial  
830 structure in species communities with spatially explicit joint species distribution models.  
831 *Methods in Ecology and Evolution* 7, 428–436. doi:[https://doi.org/10.1111/2041-](https://doi.org/10.1111/2041-210X.12502)  
832 [210X.12502](https://doi.org/10.1111/2041-210X.12502).

833 Ovaskainen, O., Tikhonov, G., Norberg, A., Blanchet, F. G., Duan, L., Dunson, D., et al., (2017).  
834 How to make more out of community data? A conceptual framework and its  
835 implementation as models and software. *Ecology Letters* 20, 561–576.  
836 doi:<https://doi.org/10.1111/ele.12757>.

- 837 Pauvert, C., Buée, M., Laval, V., Edel-Hermann, V., Fauchery, L., Gautier, A., et al., (2019).  
838 Bioinformatics matters: The accuracy of plant and soil fungal community data is highly  
839 dependent on the metabarcoding pipeline. *Fungal Ecology* 41, 23–33.  
840 doi:[10.1016/j.funeco.2019.03.005](https://doi.org/10.1016/j.funeco.2019.03.005).
- 841 PRISM Climate Group, Oregon State University, <http://prism.oregonstate.edu>, created May 28,  
842 2020
- 843 Pöhlme, S., Abarenkov, K., Nilsson, H. R., Lindahl, B. D., Clemmensen, K. E., Kauserud, H., et  
844 al., (2021). FungalTraits: a user-friendly traits database of fungi and fungus-like  
845 stramenopiles. *Fungal Diversity*. doi:[10.1007/s13225-020-00466-2](https://doi.org/10.1007/s13225-020-00466-2).
- 846 Richardson, A. D., Bailey, A. S., Denny, E. G., Martin, C. W., and O’keefe, J. (2006). Phenology  
847 of a northern hardwood forest canopy. *Global Change Biology* 12, 1174–1188.  
848 doi:[10.1111/j.1365-2486.2006.01164.x](https://doi.org/10.1111/j.1365-2486.2006.01164.x).
- 849 Rivers, A. R., Weber, K. C., Gardner, T. G., Liu, S., and Armstrong, S. D. (2018). ITSxpress:  
850 Software to rapidly trim internally transcribed spacer sequences with quality scores for  
851 marker gene analysis. *F1000Res* 7, 1418. doi:[10.12688/f1000research.15704.1](https://doi.org/10.12688/f1000research.15704.1).
- 852 Rognes, T., Flouri, T., Nichols, B., Quince, C., and Mahé, F. (2016). VSEARCH: a versatile  
853 open source tool for metagenomics. *PeerJ* 4, e2584. doi:[10.7717/peerj.2584](https://doi.org/10.7717/peerj.2584).
- 854 Rossman, A. Y., Seifert, K. A., Samuels, G. J., Minnis, A. M., Schroers, H.-J., Lombard, L., et  
855 al., (2013). Genera in Bionectriaceae, Hypocreaceae, and Nectriaceae (Hypocreales)  
856 proposed for acceptance or rejection. *IMA Fungus* 4, 41–51.  
857 doi:[10.5598/imafungus.2013.04.01.05](https://doi.org/10.5598/imafungus.2013.04.01.05).
- 858 Schroers, H.-J., Samuels, G. J., Seifert, K. A., and Gams, W. (1999). Classification of the  
859 mycoparasite *Gliocladium roseum* in *Clonostachys* as *C. rosea*, its relationship to

- 860 Bionectria ochroleuca, and notes on other Gliocladium-like fungi. *Mycologia* 91, 365–385.  
861 doi:[10.1080/00275514.1999.12061028](https://doi.org/10.1080/00275514.1999.12061028).
- 862 Shapiro, S. S., and Wilk, M. B. (1965). An Analysis of Variance Test for Normality (Complete  
863 Samples). *Biometrika* 52, 591–611. doi:[10.2307/2333709](https://doi.org/10.2307/2333709).
- 864 Shigo, A. L. (1972). The Beech Bark Disease Today in the Northeastern U.S. *Journal of*  
865 *Forestry* 70, 286–289. doi:[10.1093/jof/70.5.286](https://doi.org/10.1093/jof/70.5.286).
- 866 Stauder, C. M., Garnas, J. R., Morrison, E. W., Salgado-Salazar, C., and Kasson, M. T. (2020b).  
867 Characterization of mating type genes in heterothallic Neonectria species, with emphasis  
868 on *N. coccinea*, *N. ditissima*, and *N. faginata*. *Mycologia* 112, 880–894.  
869 doi:[10.1080/00275514.2020.1797371](https://doi.org/10.1080/00275514.2020.1797371).
- 870 Stauder, C. M., Utano, N. M., and Kasson, M. T. (2020a). Resolving host and species boundaries  
871 for perithecia-producing nectriaceous fungi across the central Appalachian Mountains.  
872 *Fungal Ecology* 47, 100980. doi:[10.1016/j.funeco.2020.100980](https://doi.org/10.1016/j.funeco.2020.100980).
- 873 Stone, J. K., Polishook, J. D., and White, J. F. (2004). “Endophytic fungi,” in *Biodiversity of*  
874 *Fungi*, eds. M. Foster and G. Bills (Burlington: Elsevier Academic Press), 241–270.  
875 doi:[10.13140/RG.2.1.2497.0726](https://doi.org/10.13140/RG.2.1.2497.0726).
- 876 Taylor, D. L., Walters, W. A., Lennon, N. J., Bochicchio, J., Krohn, A., Caporaso, J. G., et al.,  
877 (2016). Accurate Estimation of Fungal Diversity and Abundance through Improved  
878 Lineage-Specific Primers Optimized for Illumina Amplicon Sequencing. *Appl. Environ.*  
879 *Microbiol.* 82, 7217–7226. doi:[10.1128/AEM.02576-16](https://doi.org/10.1128/AEM.02576-16).
- 880 Tikhonov, G., Abrego, N., Dunson, D., and Ovaskainen, O. (2017). Using joint species  
881 distribution models for evaluating how species-to-species associations depend on the



- 882 environmental context. *Methods in Ecology and Evolution* 8, 443–452. doi:[10.1111/2041-](https://doi.org/10.1111/2041-210X.12723)  
883 [210X.12723](https://doi.org/10.1111/2041-210X.12723).
- 884 Tjur, T. (2009). Coefficients of Determination in Logistic Regression Models—A New Proposal:  
885 The Coefficient of Discrimination. *The American Statistician* 63, 366–372.  
886 doi:[10.1198/tast.2009.08210](https://doi.org/10.1198/tast.2009.08210).
- 887 Unterseher, M. (2011). “Diversity of Fungal Endophytes in Temperate Forest Trees,” in  
888 *Endophytes of Forest Trees: Biology and Applications* Forestry Sciences., eds. A. M.  
889 Pirttilä and A. C. Frank (Dordrecht: Springer Netherlands), 31–46. doi:[10.1007/978-94-](https://doi.org/10.1007/978-94-007-1599-8_2)  
890 [007-1599-8\\_2](https://doi.org/10.1007/978-94-007-1599-8_2).
- 891 Veech, J. A. (2013). A probabilistic model for analysing species co-occurrence. *Global Ecology*  
892 *and Biogeography* 22, 252–260. doi:<https://doi.org/10.1111/j.1466-8238.2012.00789.x>.
- 893 Wingfield, M. J., Garnas, J. R., Hajek, A., Hurley, B. P., de Beer, Z. W., and Taerum, S. J.  
894 (2016). Novel and co-evolved associations between insects and microorganisms as drivers  
895 of forest pestilence. *Biol Invasions* 18, 1045–1056. doi:[10.1007/s10530-016-1084-7](https://doi.org/10.1007/s10530-016-1084-7).
- 896 Wingfield, M. J., Slippers, B., and Wingfield, B. D. (2010). Novel associations between  
897 pathogens, insects and tree species threaten world forests. *New Zealand Journal of Forestry*  
898 *Science*, 9.
- 899
- 900

901 **Tables and Figure legends**

902 **Table 1.** Summary of ecological guilds in addition to primary pests and pathogens that are  
903 potentially involved in tree decline associated with multi-species disease complexes. These  
904 include both insects and fungi and may have negative (-), positive (+) or no effect (0) on hosts.

---

| Functional role (guild) | Effect on host | Description                                                                                                                                                    |
|-------------------------|----------------|----------------------------------------------------------------------------------------------------------------------------------------------------------------|
| Other pathogens         | -              | Direct effects on host, could synergize or antagonize primary insect/pathogen impacts                                                                          |
| Decay fungi             | -/0            | Increase susceptibility to snap, interrupt vascular transport, reduce resource quality or availability for primary insect/pathogen (could be positive of host) |
| Other insects           | -/0            | Competition for resources, tree defense induction, predation (including intra-guild), vectors (for other microbes, mites, nematodes, etc.)                     |
| Mycoparasites           | +              | Reduce growth, survival/longevity, or spore production of 1°/2° pathogens                                                                                      |
| Entomopathogens         | +/0            | Reduce survival, longevity of 1°/2° insects                                                                                                                    |
| Non-pathogenic microbes | +/-/0          | Competition for resources, tree defense induction, viral reservoirs?                                                                                           |
| Endophytes              | +/-/0          | Roles variable and largely unknown, potential defensive symbionts, latent pathogens, early-colonizing saprotrophs, etc.                                        |

---

905

906

907 **Table 2.** Site locations and duration of BBD infection in terms of years since beech scale first  
908 observed. Beech scale observations based on Cale et al., 2017.

| State          | Latitude | Longitude | Number of trees with $\geq$ 1000 sequences | Duration of infection (years) |
|----------------|----------|-----------|--------------------------------------------|-------------------------------|
| Maine          | 46.6585  | -68.6913  | 10                                         | 68                            |
| Maine          | 44.8307  | -68.5996  | 7                                          | 68                            |
| New Hampshire  | 43.1340  | -70.9510  | 13                                         | 59                            |
| New York       | 44.4924  | -74.0295  | 6                                          | 43                            |
| New York       | 43.0841  | -74.4406  | 11                                         | 58                            |
| Pennsylvania   | 41.2144  | -75.3834  | 8                                          | 42                            |
| Michigan       | 45.3179  | -84.6723  | 11                                         | 12                            |
| Wisconsin      | 44.9284  | -87.1891  | 21                                         | 9                             |
| West Virginia  | 38.6074  | -79.8443  | 10                                         | 19                            |
| North Carolina | 35.3203  | -82.8439  | 5                                          | 20                            |

909  
910

911 **Table 3.** ASVs associated with at least two indicators of disease according to ISA (columns “Disease indicators (ISA)”). Taxonomy is  
 912 listed as order, species epithet where available, or most informative taxonomic level. Those five ASVs that were strongest predictors  
 913 of community composition according to PERMANOVA are bolded. Functional classifications are provided (*sensu* Polme et al., 2021).

| Disease state                   | Disease Indicators (ISA) |         |             |            |       | Taxonomy (Order, Genus/Species)                  | Function <sup>†‡</sup>                                         | ASV           |
|---------------------------------|--------------------------|---------|-------------|------------|-------|--------------------------------------------------|----------------------------------------------------------------|---------------|
|                                 | Crown Dieback            | Cankers | Beech Scale | Perithecia | Nf/Nd |                                                  |                                                                |               |
| Healthy beech                   | 0                        | 0       |             |            |       | Unidentified Ascomycota                          |                                                                | ASV_229       |
|                                 | 0                        | 1       |             |            |       | Lecanorales, Lecania croatica                    | L                                                              | ASV_169       |
|                                 | 0                        | 0       | 0           |            |       | Hypocreales, Microcera sp.                       | A                                                              | ASV_575       |
|                                 | 0                        | 0       | 0           |            |       | Chaetothyriales, Capronia sp.                    | S <sup>1</sup> ,E <sup>2</sup> ,A <sup>3</sup> ,M <sup>3</sup> | ASV_427       |
|                                 | 0                        | 0       | 0           |            |       | Unidentified Capnodiales                         |                                                                | ASV_272       |
|                                 | 0                        | 0       | 0           |            |       | unidentified Fungi                               |                                                                | ASV_441       |
|                                 | 0                        | 0       | 0           |            |       | Unidentified Ascomycota                          |                                                                | ASV_524       |
|                                 | 0                        | 0       | 0           |            |       | Unidentified Capnodiales                         |                                                                | ASV_596       |
|                                 | 0                        | 0       | 0           |            |       | Unidentified Ascomycota                          |                                                                | ASV_688       |
|                                 | 0                        | 1       | 0           |            |       | Chaetothyriales, Capronia sp.                    | S <sup>1</sup> ,E <sup>2</sup> ,A <sup>3</sup> ,M <sup>3</sup> | ASV_190       |
| Minor canker/ing scale absent   | 1                        | 0       | 0           |            |       | Togninales, Phaeoacremonium sp.                  | P                                                              | ASV_135       |
|                                 | 1                        | 0       | 0           |            |       | Unidentified Capnodiales                         |                                                                | ASV_166       |
|                                 | 1                        | 0       | 0           |            |       | Unidentified ASV                                 |                                                                | ASV_181       |
|                                 | 1                        | 0       | 0           |            |       | Unidentified Capnodiales                         |                                                                | ASV_200       |
| Intermediate BBD pressure       | 1-3                      | 0-2     | 2-5         |            |       | <b>Hypocreales, Neonectria faginata</b>          | P                                                              | <b>ASV_1</b>  |
|                                 | 1-3                      | 0-2     |             |            |       | Pleosporales, Neocucurbitaria sp.                | S                                                              | ASV_2         |
|                                 | 1-3                      | 0-2     |             |            |       | Pleosporales, Unidentified Thyridiaceae          | S,WS                                                           | ASV_18        |
|                                 | 1-3                      | 0-2     |             |            |       | Oribliales, Hyalobolia erythrostroma             | WS <sup>1</sup> ,A <sup>2</sup>                                | ASV_26        |
|                                 | 1-3                      | 3-5     |             |            |       | Agaricostilbales, Unidentified Chionosphaeraceae | E,M,S                                                          | ASV_78        |
| High BBD pressure               | 1-3                      | 3       | 2-5         |            |       | Chaetothyriales, Exophiala castellanii           | A <sup>1</sup> ,S <sup>2</sup> ,E <sup>3</sup>                 | ASV_343       |
|                                 | 1-3                      | 3       | 3-5         |            |       | Hypocreales, Fusarium babinda                    | P <sup>1</sup> ,S <sup>2</sup> ,E <sup>3</sup>                 | ASV_19        |
|                                 | 1-3                      | 3       | 3-5         |            |       | <b>Tremellales, Hannaella surugaensis</b>        | A                                                              | <b>ASV_5</b>  |
|                                 | 1-3                      | 3       | 3-5         |            |       | <b>Pleosporales, Coniothyrium sp.</b>            | P <sup>1</sup> ,S <sup>2</sup> ,M <sup>3</sup>                 | <b>ASV_10</b> |
|                                 | 1-3                      | 3       | 3-5         |            |       | <b>Capnodiales, Cladosporium sp.</b>             | S <sup>1</sup> ,P <sup>2</sup> ,E <sup>3</sup>                 | <b>ASV_12</b> |
|                                 | 3                        | 3       |             |            |       | Hypocreales, Microcera rubra                     | A                                                              | ASV_94        |
|                                 | 3                        | 3       |             |            |       | Myrtiliales, Unidentified Elsinaceae             | P <sup>1</sup> ,S <sup>2</sup>                                 | ASV_79        |
|                                 | 3                        | 2-3     |             |            |       | Pleosporales, Brunneofusispora sinensis          | WS                                                             | ASV_14        |
|                                 | 3                        | 2-3     |             |            |       | Pleosporales, Acercilia italica                  | WS                                                             | ASV_11        |
|                                 | 3                        | 0       |             |            |       | Chaetothyriales, Exophiala sp.                   | A <sup>1</sup> ,S <sup>2</sup> ,E <sup>3</sup>                 | ASV_320       |
| Scale and Neonectria associates | 3                        | 0       |             | 5          |       | Diaporthales, Cytophora prunicola                | P <sup>1</sup> ,S <sup>2</sup> ,E <sup>3</sup>                 | ASV_474       |
|                                 | 0                        | 3-5     |             |            |       | <b>Tremellales, Vishniacozyma taibaiensis</b>    | S                                                              | <b>ASV_27</b> |
|                                 | 0                        | 3-5     |             |            |       | Tremellales, Hannaella surugaensis               | A                                                              | ASV_234       |
|                                 | 0                        | 3-5     |             |            |       | Chaetothyriales, Cyphellophora sp.               | S <sup>1</sup> ,A <sup>2</sup>                                 | ASV_119       |
|                                 | 0                        | 3-5     |             |            |       | Pleosporales, Acercilia italica                  | WS                                                             | ASV_212       |
|                                 | 0                        | 3-5     |             |            |       | unidentified Cystobasidiomycetes                 |                                                                | ASV_136       |
|                                 | 0                        | 0       |             |            |       | Hypocreales, Acremonium alternatum               | A                                                              | ASV_126       |
|                                 | 0                        | 5       |             |            |       | Xylariales, Phialemonium ocularis                | S <sup>1</sup> ,E <sup>2</sup>                                 | ASV_69        |
|                                 | 0                        | 0       |             |            |       | Helotiales, Cadophora melinii                    | S <sup>1</sup> ,P <sup>2</sup> ,E <sup>3</sup>                 | ASV_217       |

† Functional classifications: A: animal pathogen including entomopathogens, E: endophyte, M: mycoparasite, P: plant pathogen, S: Saprotrroph, WS: wood saprotroph, L: lichenized  
 ‡ Primary and secondary lifestyles according to Polme et al., (2021) are indicated by <sup>1</sup> and <sup>2</sup>. Where tertiary lifestyles such as endophytic capacity is provided by Polme et al., those are indicated by <sup>3</sup>.  
 Where classifications at the family level were performed all potential guild information is listed without indicating primary or secondary lifestyle status.

914  
 915  
 916

918

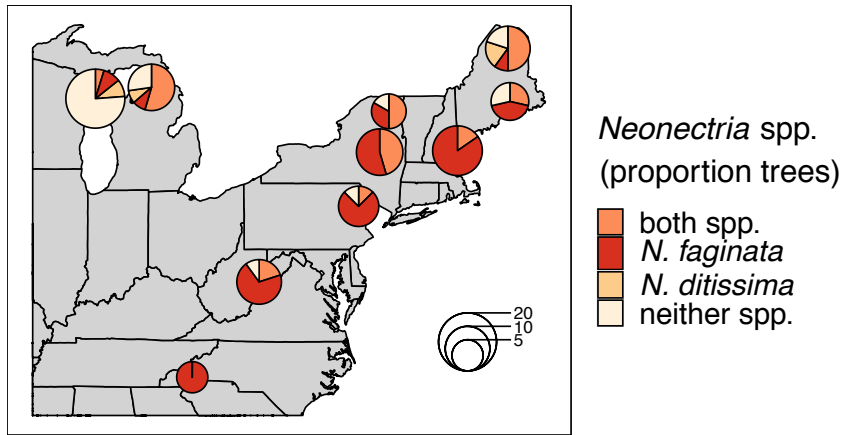

919

920 **Figure 1.** *Neonectria* species occurrence across ten sites. Proportions in pie charts indicate the  
921 number of trees in a site where a species was detected using metabarcoding. The number of trees  
922 per site is indicated by pie chart diameter.

923

924

925

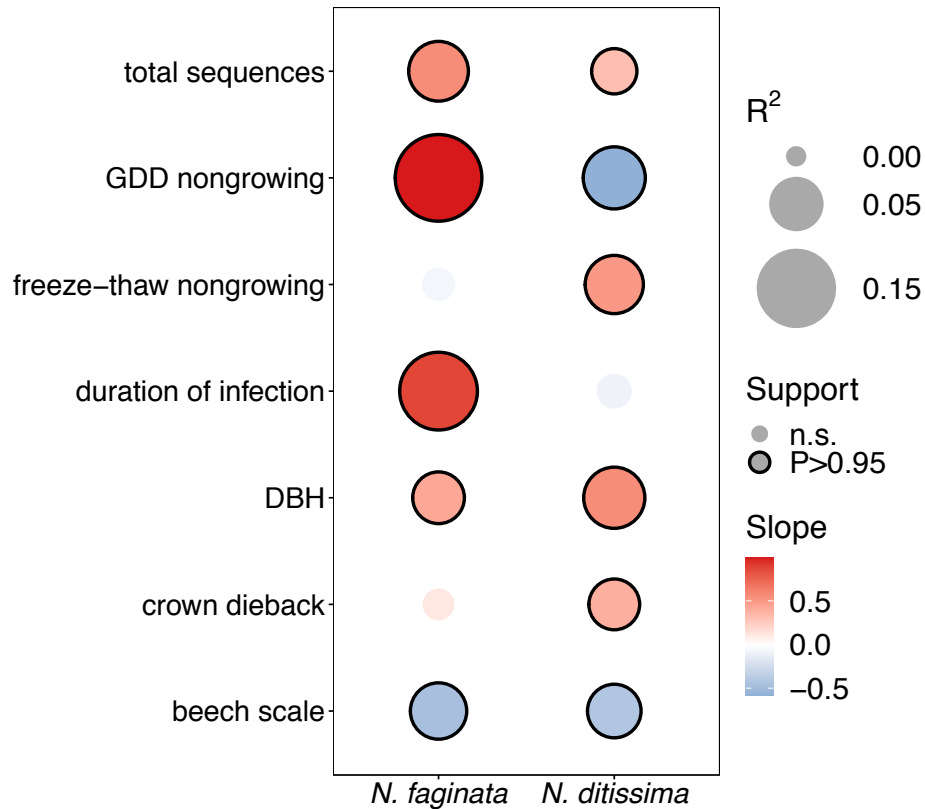

926

927 **Figure 2.** Effects of disease severity and climate on *Neonectria* species occurrence within trees.

928 Points with solid outlines represent significant effects at posterior probability  $P > 0.95$

929 (analogous to a p-value of  $P < 0.05$ ). Box fill indicates the strength and direction of the

930 relationship with blue indicating a negative slope, and red indicating a positive slope. Point size

931 indicates magnitude of  $R^2$  with overall fits for *N. faginata* and *N. ditissima* of Tjur  $R^2 = 0.54$  and

932  $0.37$ , respectively.

933

934

935

936

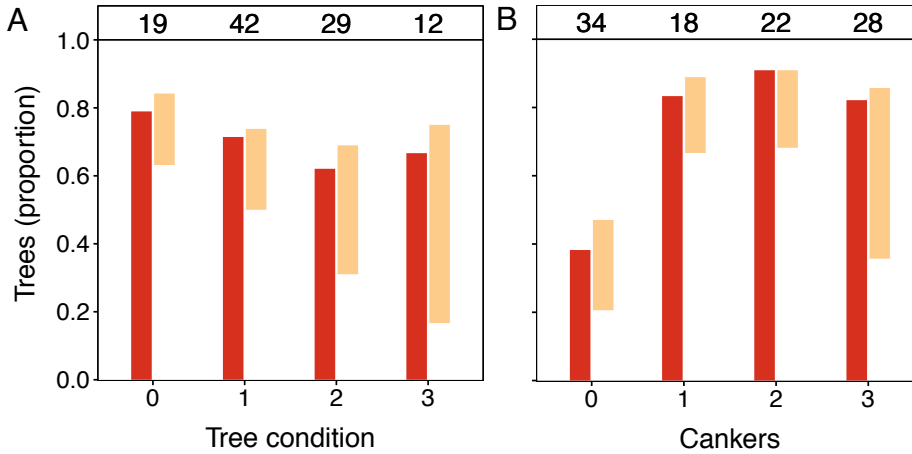

937

938 **Figure 3.** Occurrence of *N. faginata* and *N. ditissima* across levels of crown dieback (A) and

939 cankering (B). The proportion of trees in which each species was detected is indicated for *N.*

940 *faginata* (dark red) and *N. ditissima* (light red). The proportion of co-occurrence is indicated by

941 overlap of the bars and the remaining white space indicates the proportion of trees where neither

942 species was detected. The number of trees per grouping (n) is indicated above respective bars.

943

944

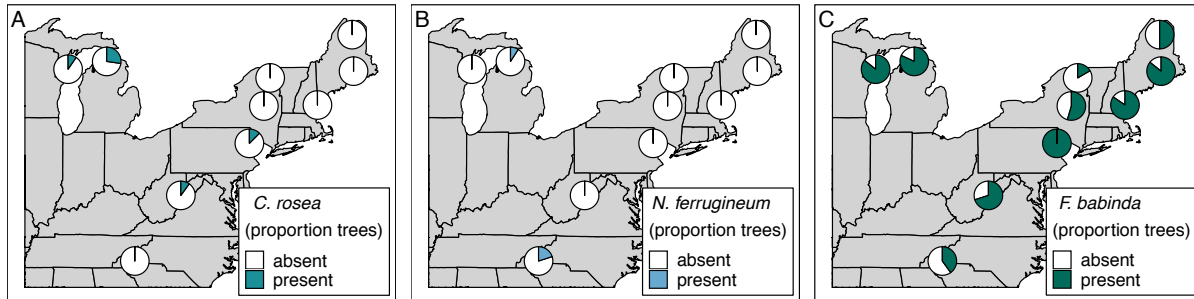

945

946 **Figure 4.** Occurrence of ASVs 16 and 21, *Clonostachys rosea* (A), ASV 807, *Nematogonum*  
947 *ferrugineum* (B), and ASV 19, *Fusarium babinda* (C), across ten sites. Proportions in pie charts  
948 indicate the number of trees in a site where the species was detected using metabarcoding.

949



950

## SUPPLEMENTARY MATERIAL

951 **Pathogen and endophyte assemblages co-vary with beech bark disease progression, tree**

952

**decline, and regional climate**

953

954 Eric W. Morrison <sup>a</sup>, Matt T. Kasson <sup>b</sup>, Jeremy J. Heath <sup>a</sup>, Jeff R. Garnas <sup>a</sup>

955 <sup>a</sup> Department of Natural Resources and the Environment, University of New Hampshire,

956 Durham, NH 03824, USA

957 <sup>b</sup> Division of Plant and Soil Sciences, West Virginia University, Morgantown, WV 26506, USA

958

959

960

961

962 **Table S1.** Pairwise correlations of site mean disease severity, climate, and site characteristics (latitude, longitude, elevation).  
 963 Correlation coefficients (Pearson's  $r$  or Spearman's  $\rho$ ) are indicated in the lower triangle and  $P$  values are indicated in the upper  
 964 triangle of the matrix. Correlation coefficients are based on Pearson's  $r$  except in the case of ordinal variables or variables with non-  
 965 normal distributions (gray highlighting). Significant correlations at  $P < 0.05$  are bolded.

|                            | Latitude     | Longitude    | Elevation    | GDD4 (growing) | GDD4 (nongrowing) | Freeze-thaw (growing) | Freeze-thaw (nongrowing) | Precipitation (growing) | Precipitation (nongrowing) | Infection duration | DBH          | Perithecia density | Canker density | Beech scale density | Tree condition |
|----------------------------|--------------|--------------|--------------|----------------|-------------------|-----------------------|--------------------------|-------------------------|----------------------------|--------------------|--------------|--------------------|----------------|---------------------|----------------|
| Latitude                   |              | 0.349        | <b>0.016</b> | <b>0.047</b>   | <b>&lt;0.001</b>  | 0.277                 | 0.276                    | <b>&lt;0.001</b>        | 0.058                      | 0.273              | 0.556        | 0.385              | 0.751          | <b>0.033</b>        | 0.651          |
| Longitude                  | 0.33         |              | <b>0.026</b> | 0.536          | 0.234             | 0.298                 | 0.059                    | 0.987                   | 0.266                      | <b>&lt;0.001</b>   | 0.128        | 0.556              | <b>0.003</b>   | 0.777               | 0.907          |
| Elevation                  | <b>-0.73</b> | <b>-0.69</b> |              | 0.587          | <b>0.008</b>      | <b>0.038</b>          | 0.334                    | 0.366                   | 0.411                      | <b>0.013</b>       | 0.934        | 0.467              | 0.074          | 0.293               | 0.881          |
| GDD4 (growing)             | <b>-0.64</b> | -0.22        | 0.20         |                | <b>0.046</b>      | 0.968                 | 0.081                    | 0.328                   | 0.465                      | 0.602              | 0.987        | 0.150              | 0.347          | 0.803               | 0.511          |
| GDD4 (nongrowing)          | <b>-0.95</b> | -0.41        | <b>0.78</b>  | <b>0.64</b>    |                   | 0.056                 | 0.450                    | <b>0.033</b>            | 0.076                      | 0.173              | 0.881        | 0.214              | 0.425          | 0.244               | 0.244          |
| Freeze-thaw (growing)      | -0.38        | -0.37        | <b>0.66</b>  | 0.01           | 0.62              |                       | 0.379                    | 0.651                   | 0.419                      | 0.173              | 0.777        | 0.627              | 0.580          | 0.405               | 0.174          |
| Freeze-thaw (nongrowing)   | 0.38         | 0.61         | -0.34        | -0.58          | -0.27             | 0.31                  |                          | 0.701                   | 0.516                      | 0.120              | 0.425        | 0.934              | 0.108          | 0.777               | 0.627          |
| Precipitation (growing)    | <b>-0.96</b> | -0.01        | 0.32         | 0.35           | <b>0.67</b>       | 0.16                  | -0.14                    |                         | 0.074                      | 0.947              | 0.260        | 0.328              | 0.881          | <b>0.005</b>        | 0.701          |
| Precipitation (nongrowing) | -0.62        | 0.39         | 0.29         | 0.26           | 0.58              | 0.29                  | 0.23                     | 0.59                    |                            | 0.296              | <b>0.016</b> | 0.385              | 0.200          | <b>0.001</b>        | 0.987          |
| Infection duration         | 0.38         | <b>0.97</b>  | <b>-0.75</b> | -0.19          | -0.47             | -0.47                 | 0.52                     | 0.02                    | 0.37                       |                    | 0.084        | 0.300              | <b>0.004</b>   | 0.638               | 0.973          |
| DBH                        | 0.21         | -0.52        | -0.03        | 0.01           | 0.05              | -0.10                 | -0.28                    | -0.39                   | <b>-0.73</b>               | -0.57              |              | 0.651              | 0.310          | <b>0.043</b>        | 0.987          |
| Perithecia density         | -0.31        | 0.21         | -0.26        | 0.49           | 0.43              | 0.18                  | -0.03                    | 0.35                    | 0.31                       | 0.36               | -0.16        |                    | 0.726          | 0.533               | 0.060          |
| Canker density             | 0.12         | <b>0.83</b>  | -0.59        | -0.33          | -0.28             | -0.20                 | 0.54                     | 0.05                    | 0.44                       | <b>0.81</b>        | -0.36        | 0.13               |                | 0.446               | 0.244          |
| Beech scale density        | <b>0.67</b>  | -0.10        | -0.37        | 0.09           | -0.41             | -0.30                 | -0.10                    | <b>-0.81</b>            | <b>-0.88</b>               | -0.17              | <b>0.65</b>  | -0.22              | -0.27          |                     | 0.934          |
| Tree condition             | 0.16         | 0.04         | 0.05         | -0.24          | -0.41             | -0.47                 | -0.18                    | -0.14                   | -0.01                      | -0.01              | -0.01        | -0.61              | 0.41           | -0.03               |                |

966

967

969

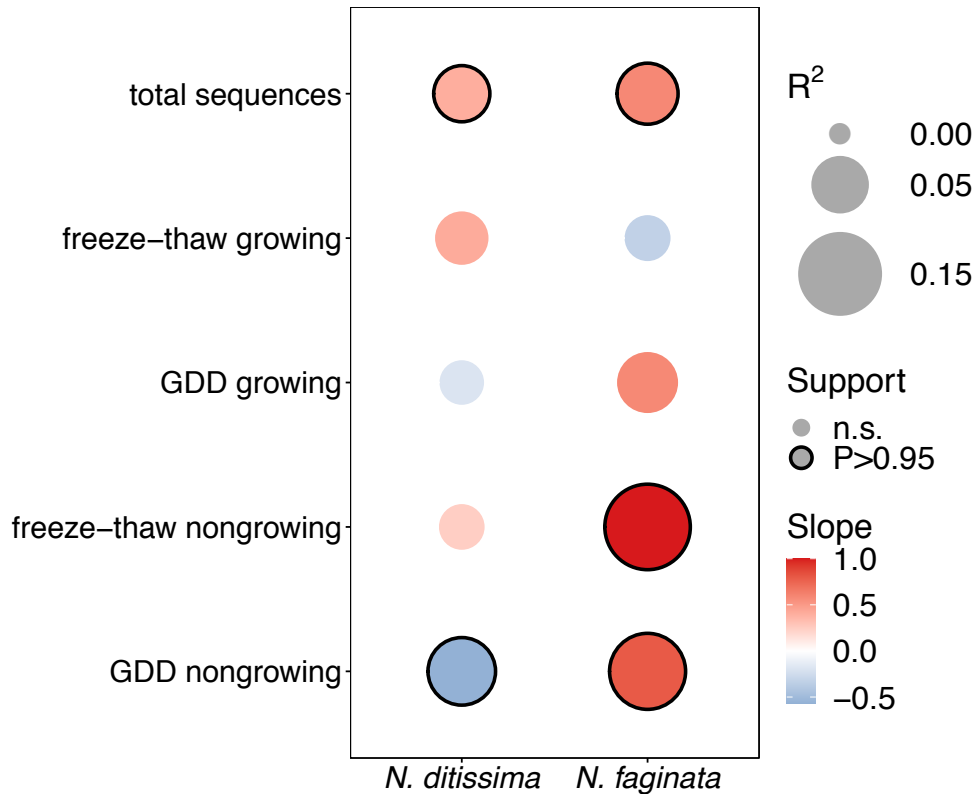

970

971 **Figure S1.** Effects of growing season and non-growing season climate on *Neonectria*  
972 distribution. Boxes with solid outlines represent effects at posterior probability  $P > 0.95$   
973 (analogous to a p-value of  $P < 0.05$ ). Box fill indicates the strength and direction of the  
974 relationship with blue indicating negative, red indicating positive. Point size indicates the  
975 magnitude of  $R^2$ .

976

977

978

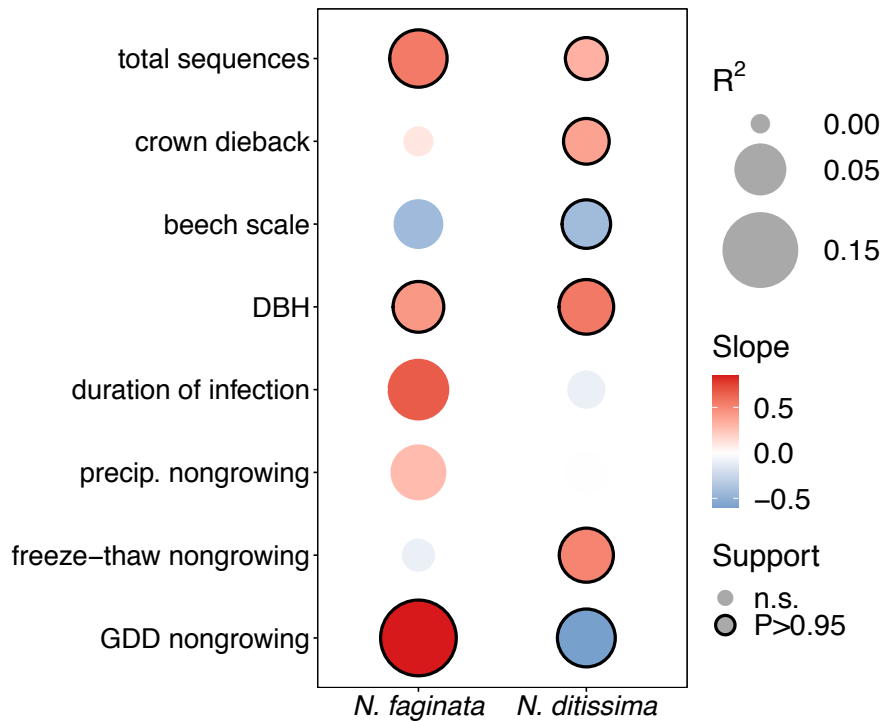

979

980 **Figure S2.** Effects of disease severity and climate on *Neonectria* species occurrence within trees.

981 This represents a variation of the model presented in Fig. 2 with nongrowing season precipitation

982 included in the model. Boxes with solid outlines represent significant effects at posterior

983 probability  $P > 0.95$  (analogous to a p-value of  $P < 0.05$ ). Box fill indicates the strength and

984 direction of the relationship with blue indicating negative, and red indicating positive. Point size

985 indicates the magnitude of  $R^2$ .

986

987

988

989

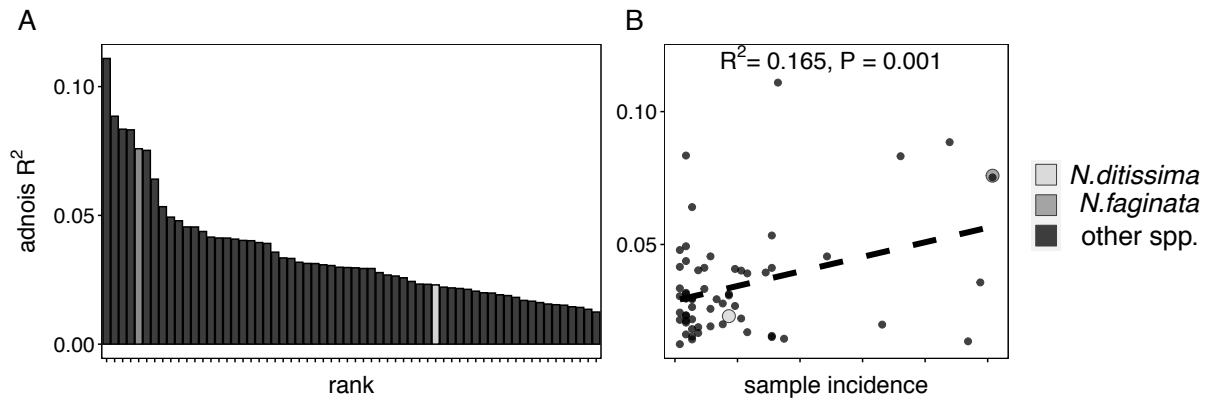

990

991 **Figure S3.** Adonis analysis of individual ASV effects on community composition (i.e.,  
992 identifying which ASVs were mostly strongly associated with community turnover). Panel A:  
993 ASV frequency versus adonis  $R^2$ . Panel B: Adonis  $R^2$  sorted largest to smallest. The top five  
994 ASVs in terms of adonis  $R^2$  are indicated in Table 2.

995

996
